# Supplementary material
Source: publisher figshare collection journal article supplement (https://frontiersin.figshare.com/ndownloader/files/15297956)
Supplement: Supplementary file [file 15297956]

# ***Supplementary Material:***

## **Wavelet-based Genomic Signal Processing for Centromere Identification and Hypothesis Generation**

### **SUPPLEMENTARY NOTES**

#### **Note S1: Wavelet-based Centromere Identification**

For the demonstrated centromere identification, we used the methylation density signal from internode explant tissue. Centromere identification was performed independently for each chromosome. SNP density and methylation density signals were mean centered (mean = 0) scaled to have standard deviation = 1. The continuous wavelet transform (CWT) was then performed on the scaled signal vectors. The methylation wavelet landscape was then used to identify the “general” centromeric/pericentromeric region of the chromosome. This gives us a general region of the chromosome to start looking for the “tooth-X-ray” shape, since identifying the centromere “valley” in the SNP wavelet landscapes by looking for minimum wavelet coefficients could instead identify valleys in other parts of the chromosome (see for example in chromosome 1, Figure S23, the minimum wavelet coefficient does not appear in the middle of the “tooth-X-ray” shape.)

The procedure for identifying centromere positions is as follows:

1. Identify the position of the maximum wavelet coefficient in the upper third of the methylation landscape. We call the scale at which this maximum occurs the “pericentromere scale”.
2. Find the putative pericentromere borders as the zeros on their side of this maximum. If the centromere is near the end of the chromosome, the one “pericentromere border” might be the edge of the chromosome.
3. Identify the the minimum coefficient in the lower two thirds of the SNP wavelet landscape, between the approximate pericentromere borders. We call the scale at which this minimum occurs the “centromere scale”.
4. Extract the SNP wavelet coefficient vector at centromere scale and the methylation wavelet coefficient vector at pericentromere scale.
5. Mean center (mean = 0) and scale these vectors to have standard deviation 1, and find the approximate centromere location as the position of maximum difference between these two vectors.

## SUPPLEMENTARY FIGURES

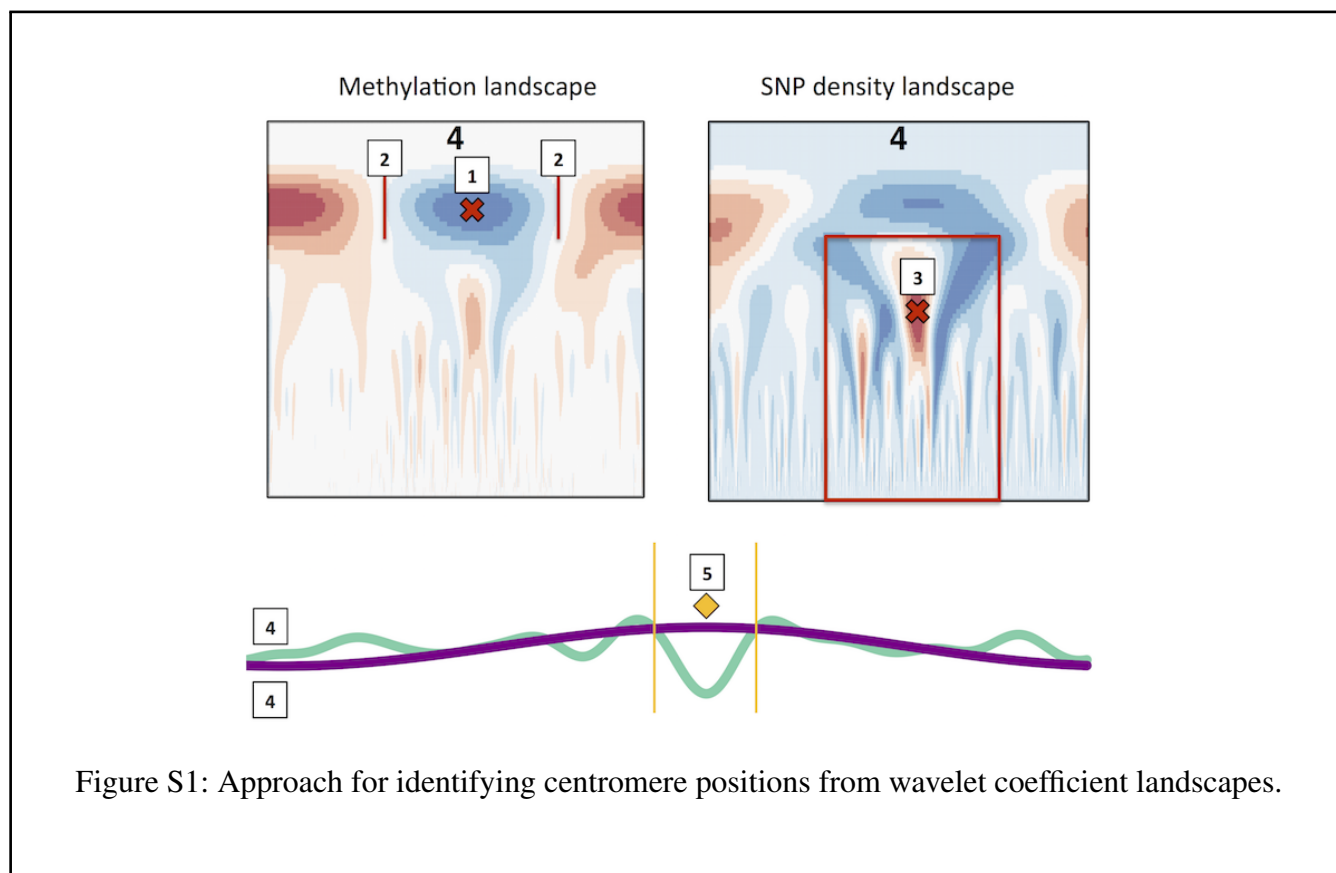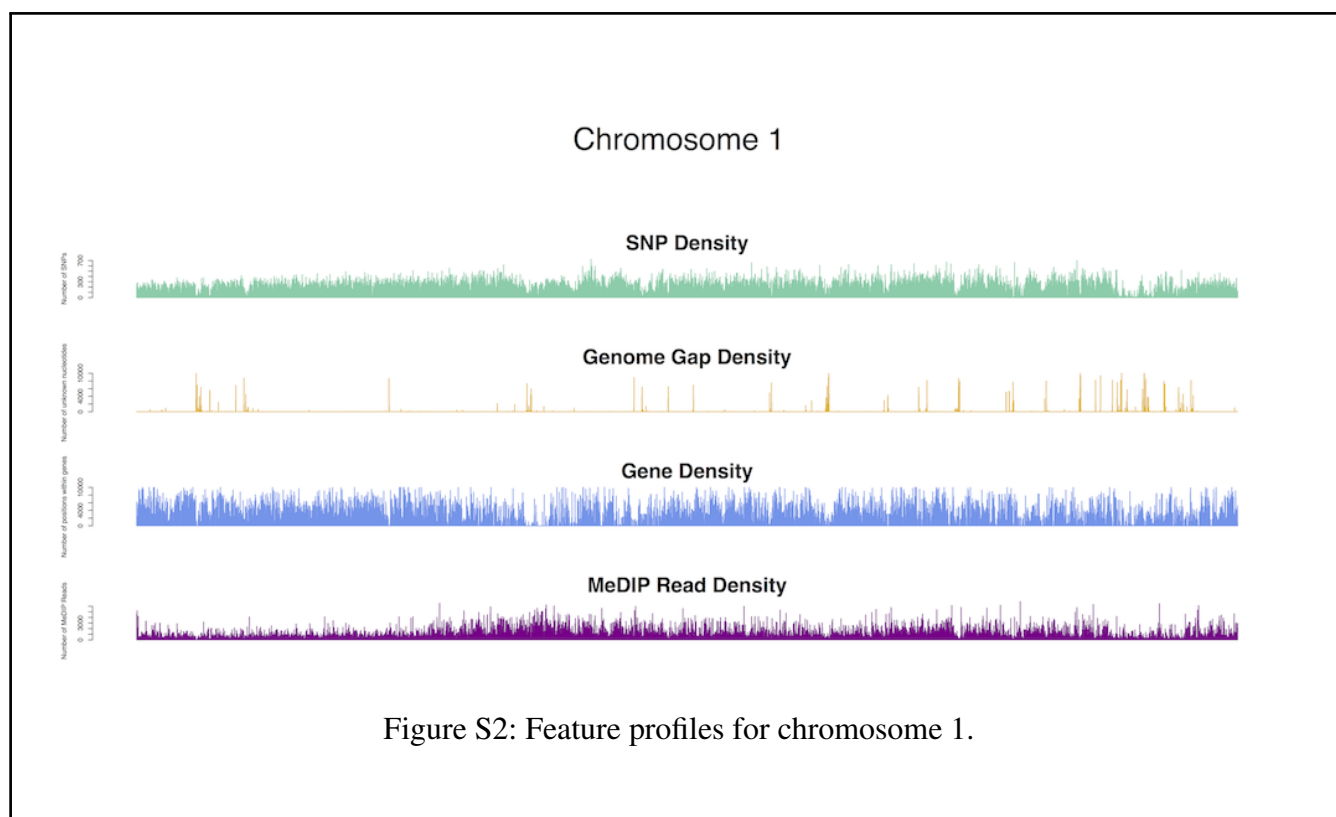

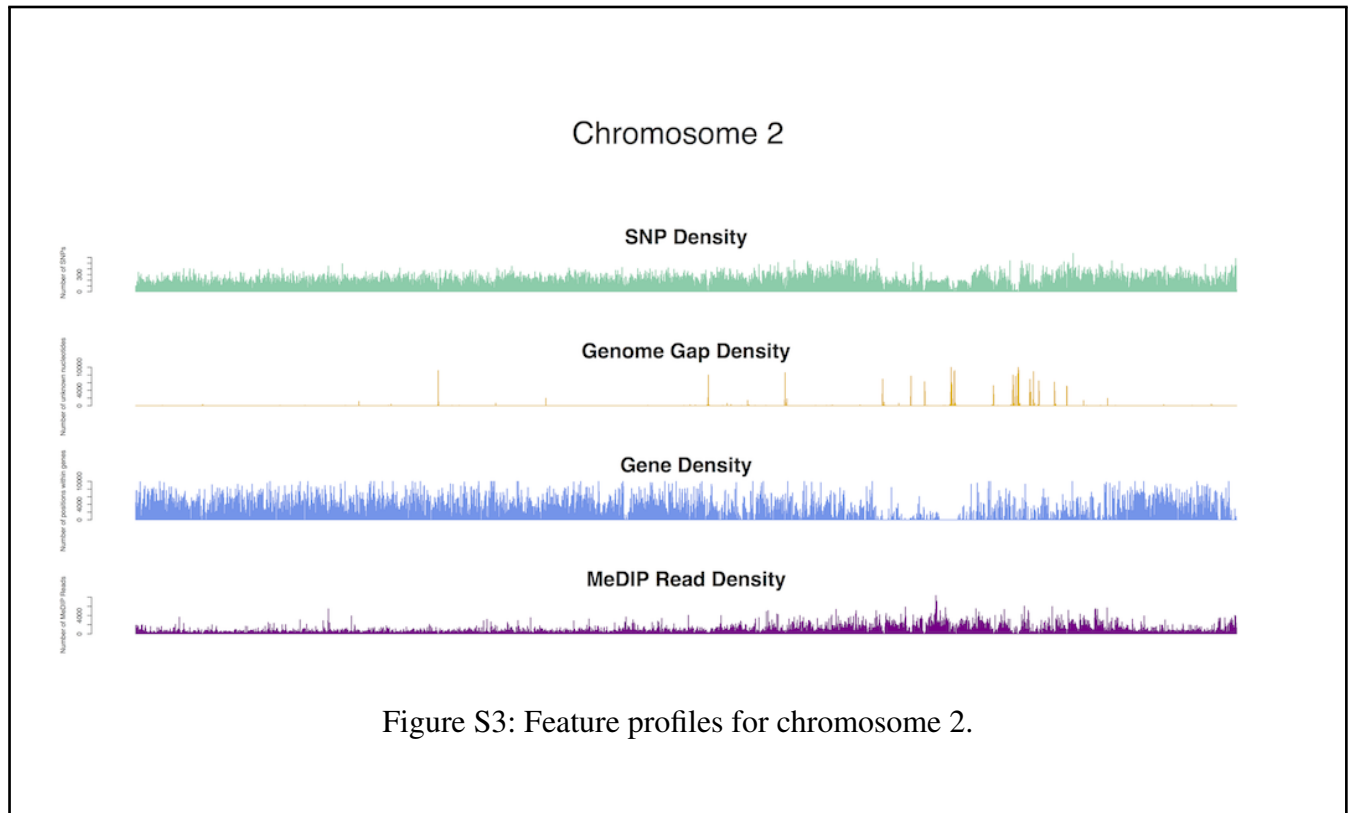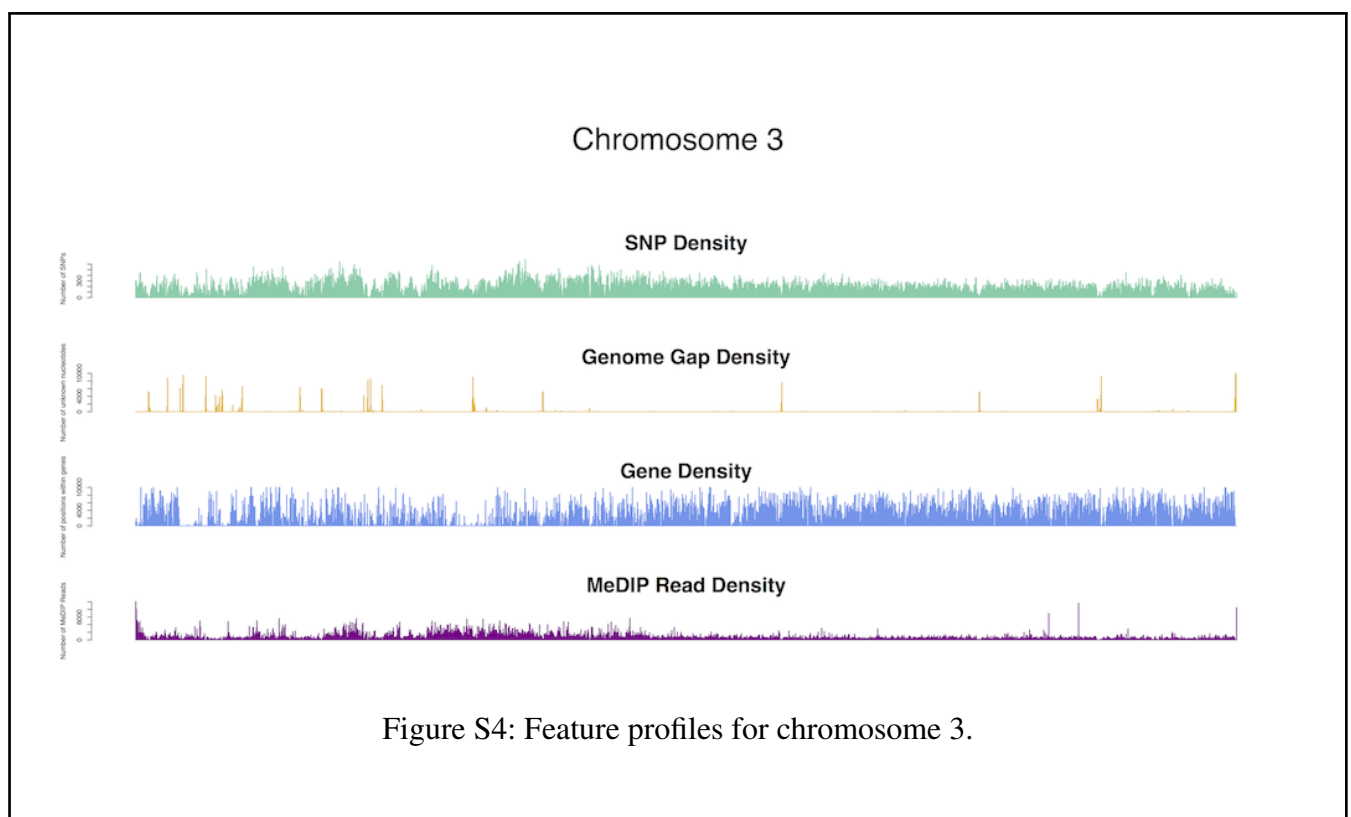

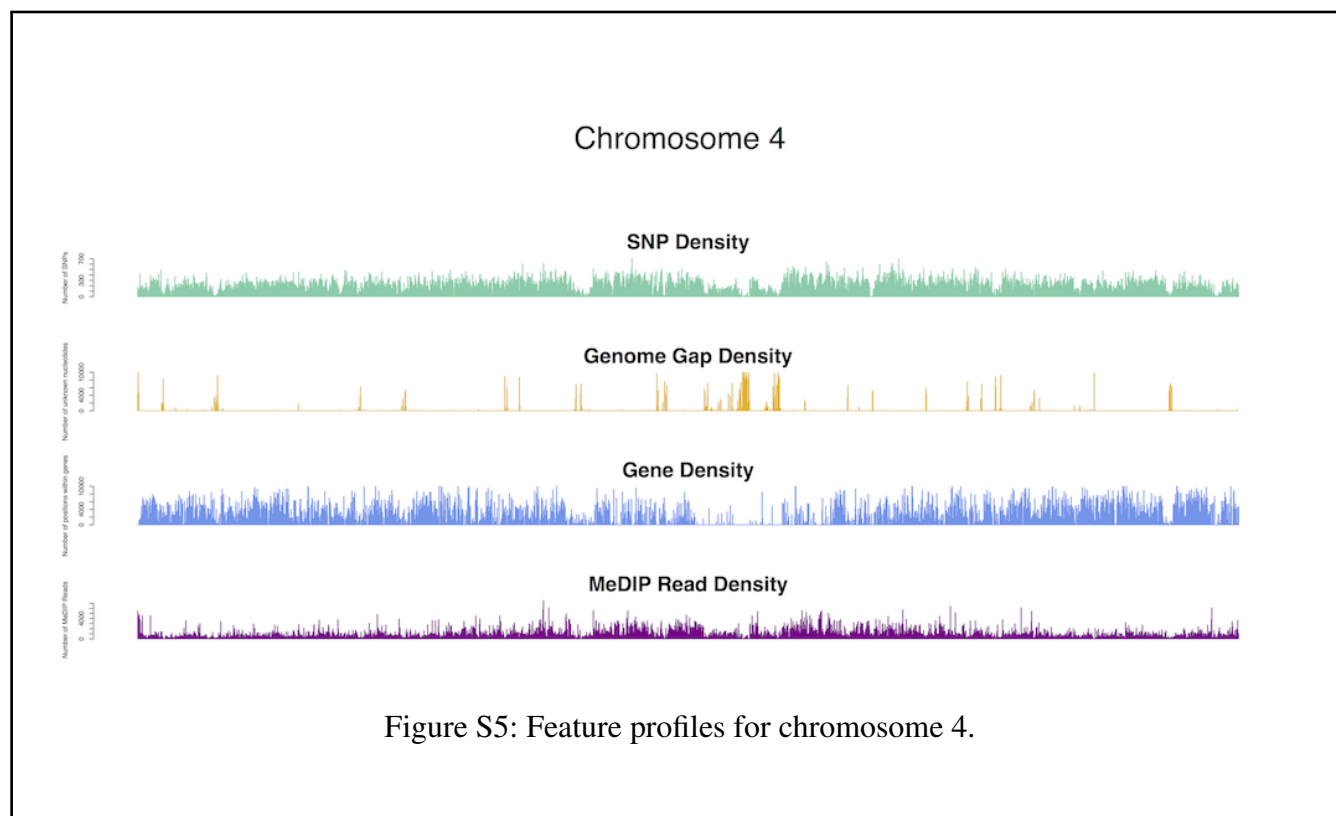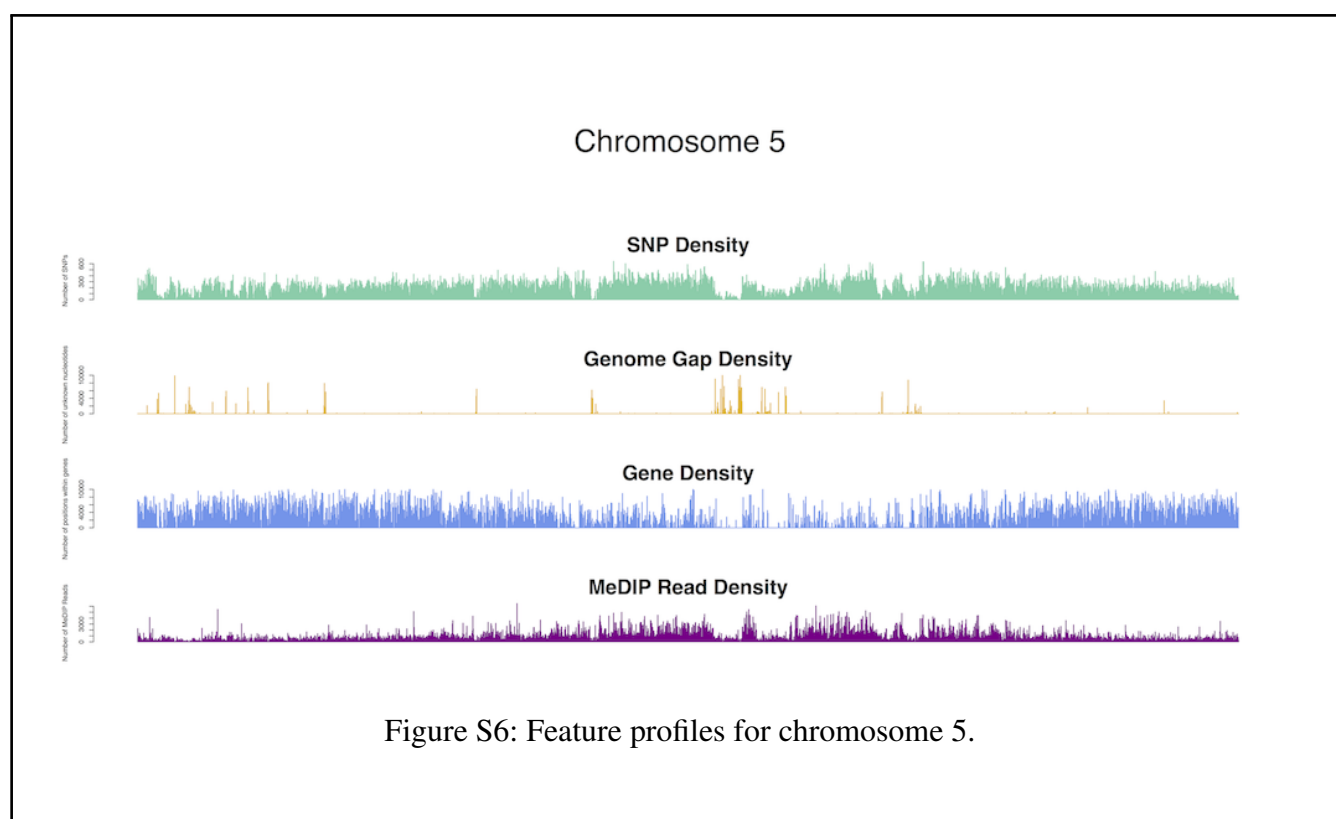



## Chromosome 6

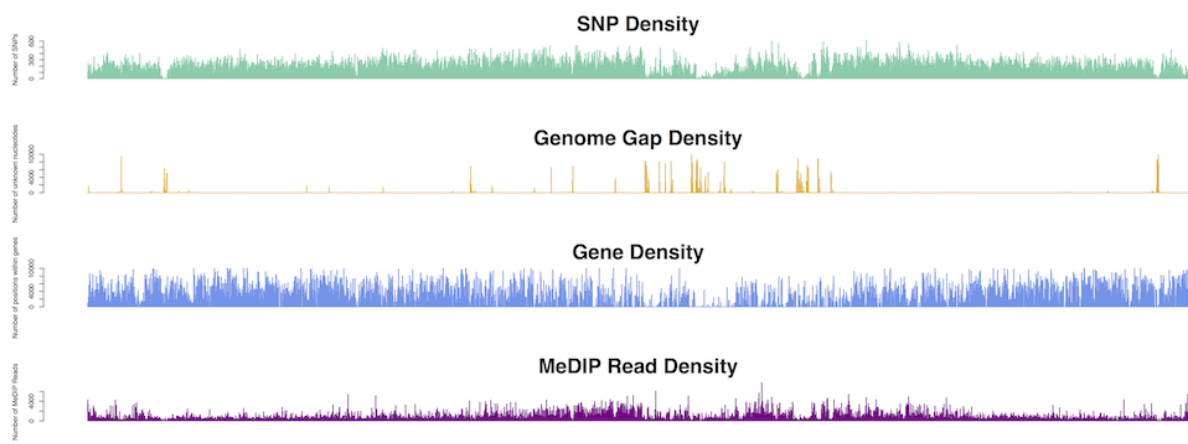

Figure S7: Feature profiles for chromosome 6.

## Chromosome 7

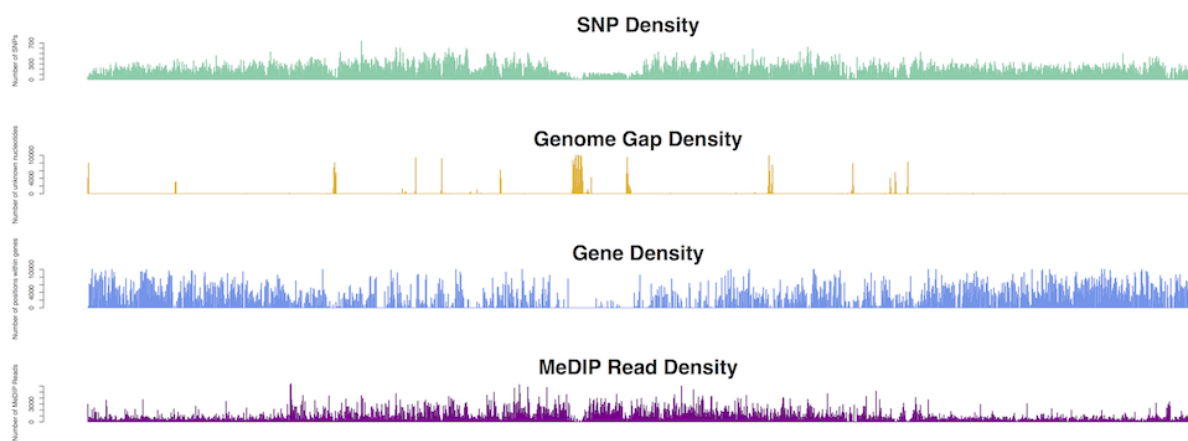

Figure S8: Feature profiles for chromosome 7.

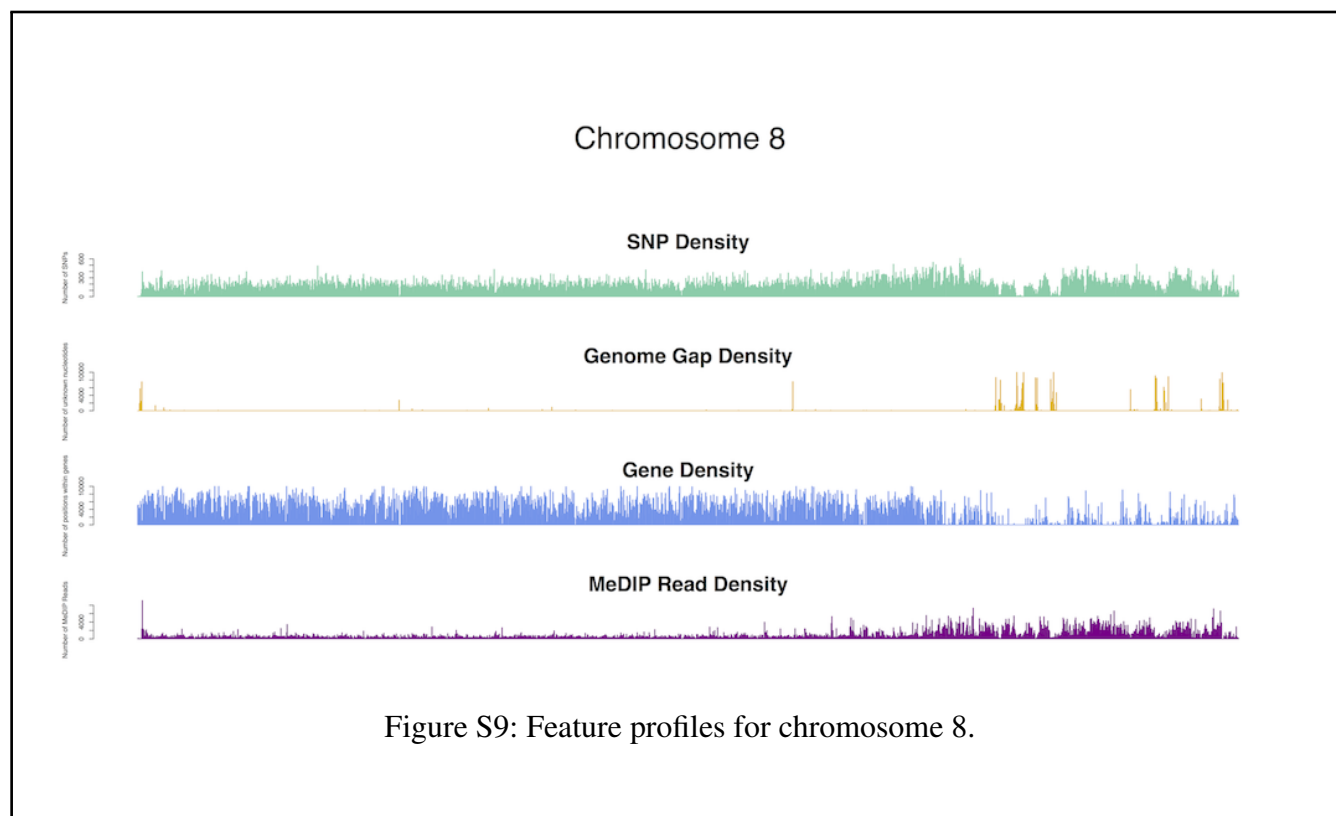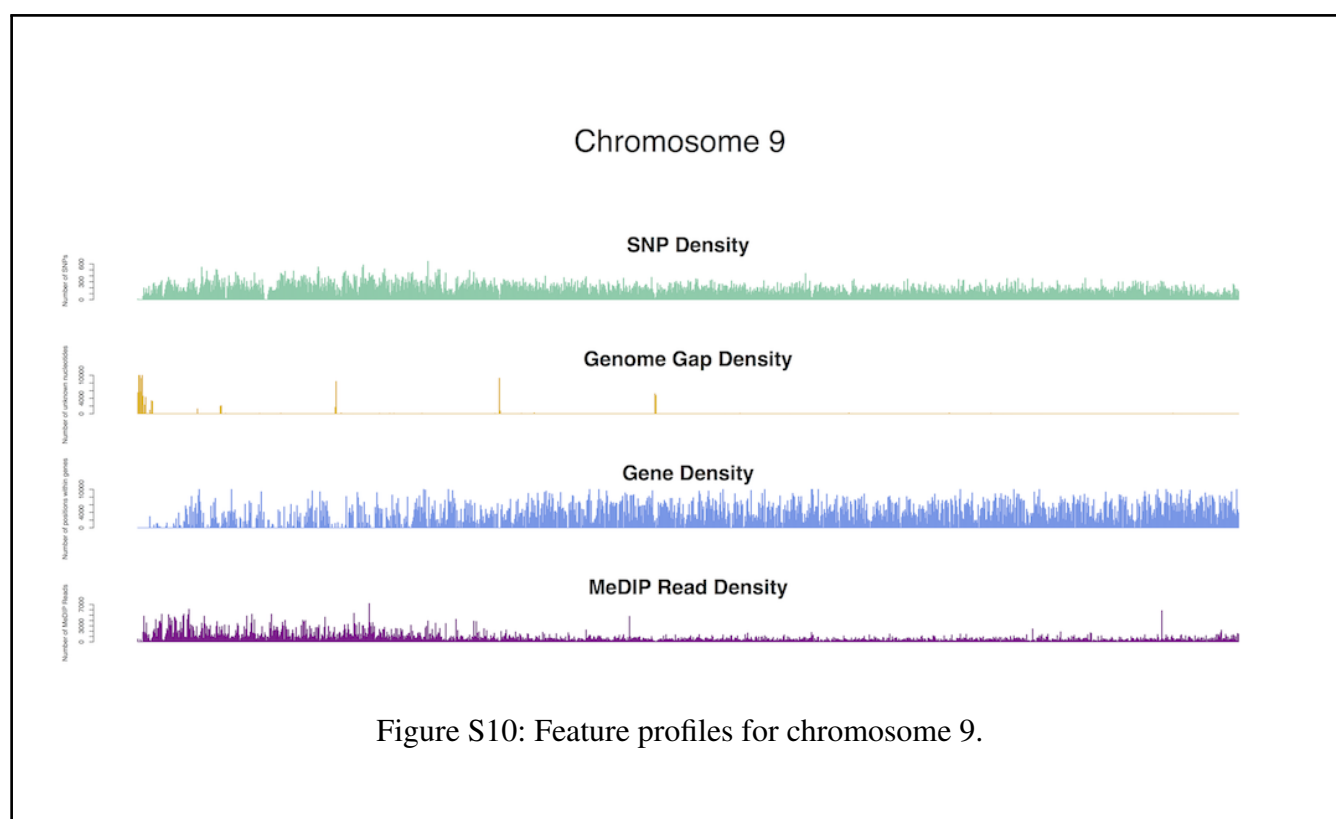

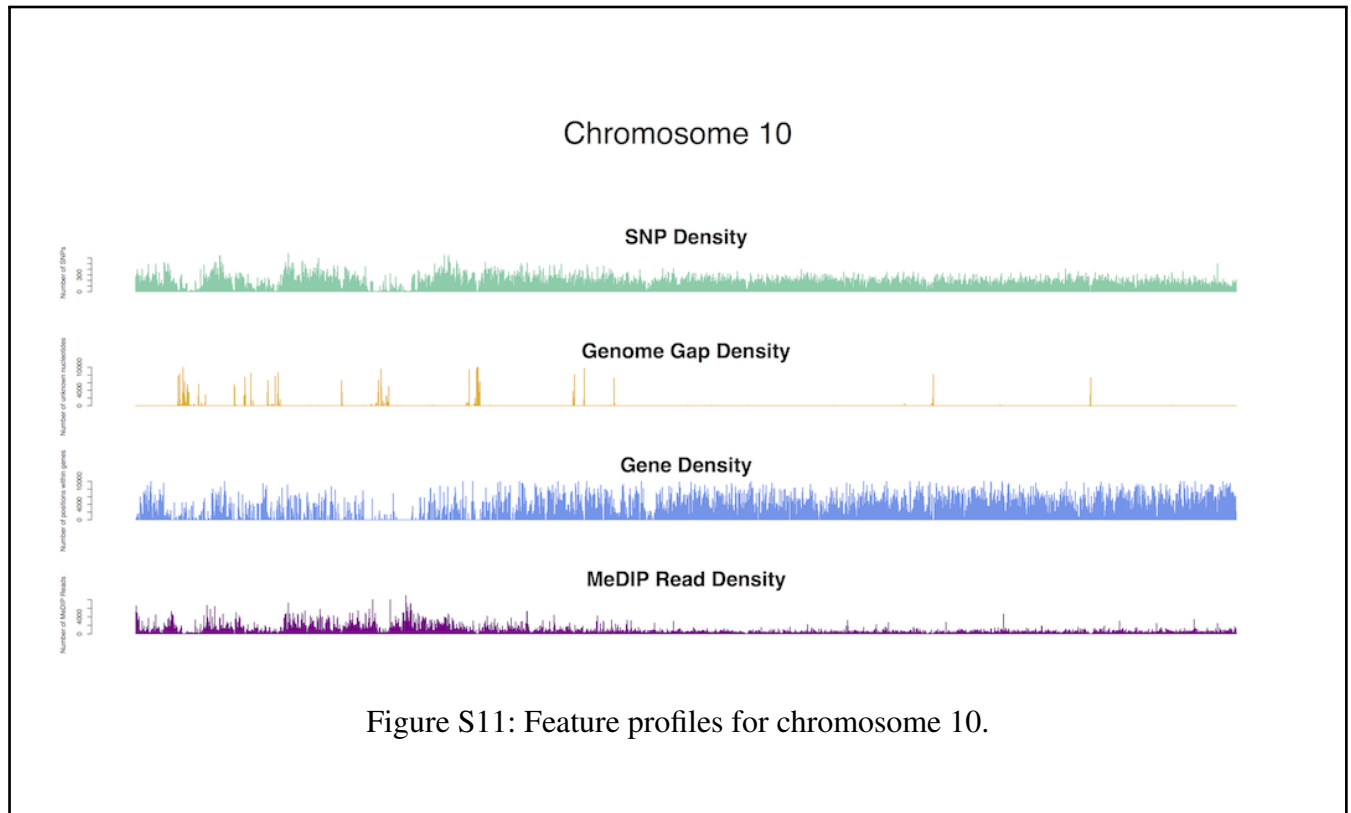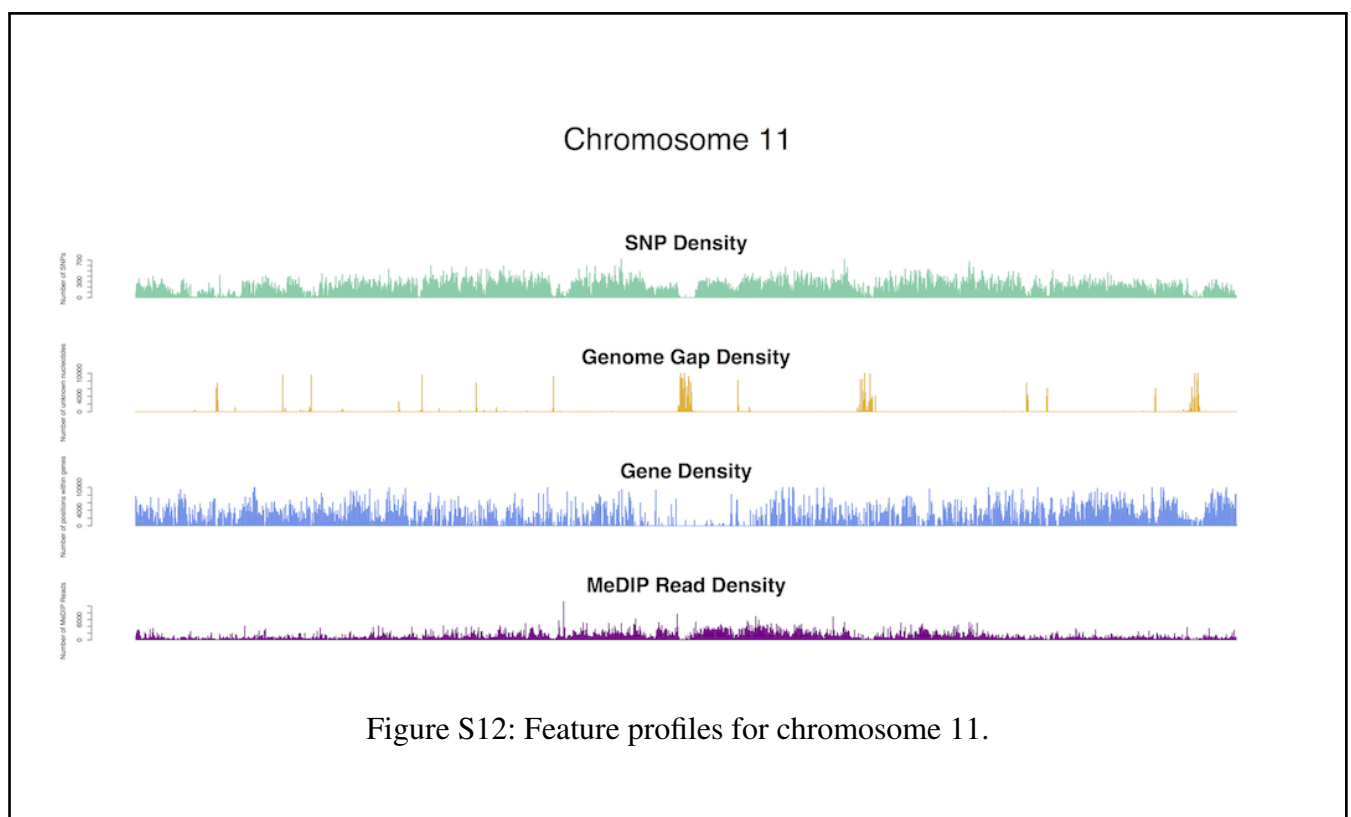

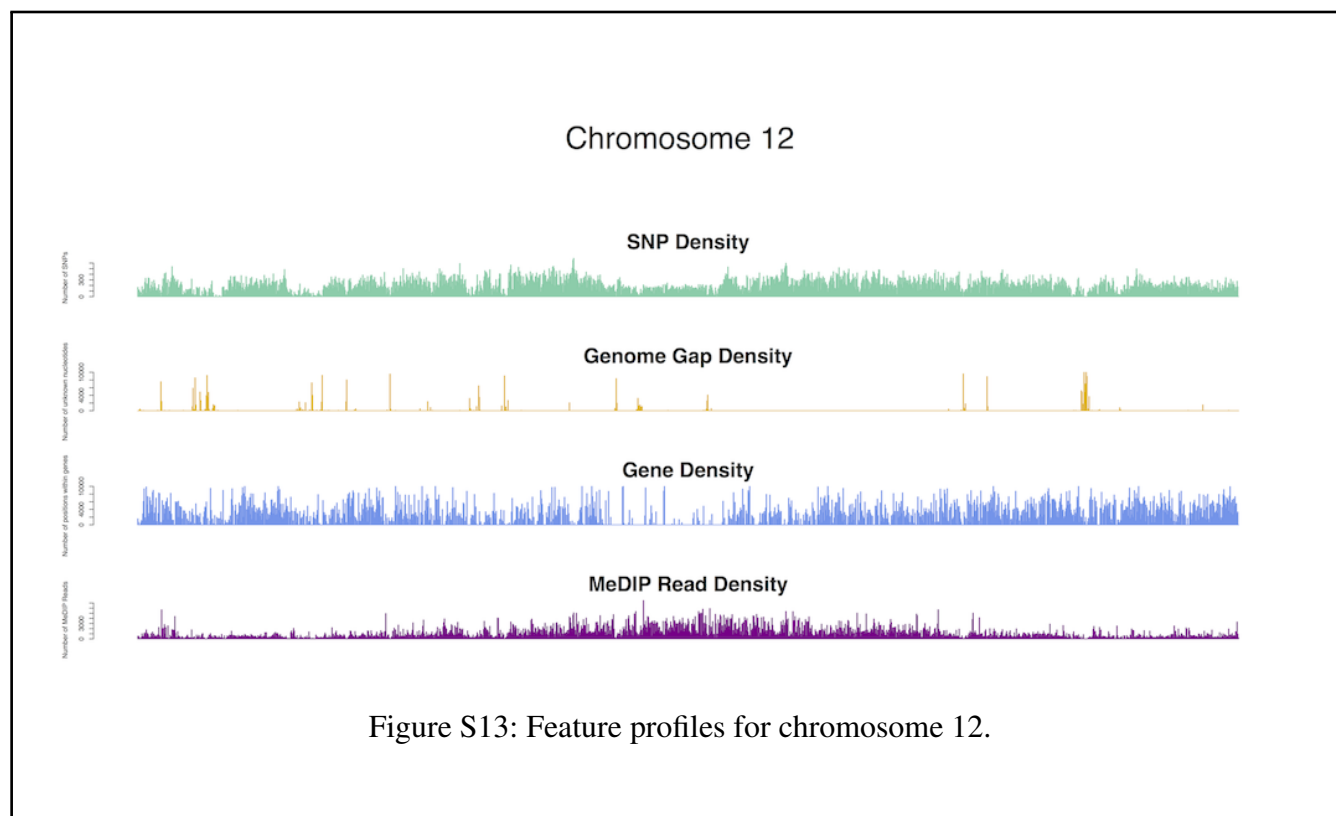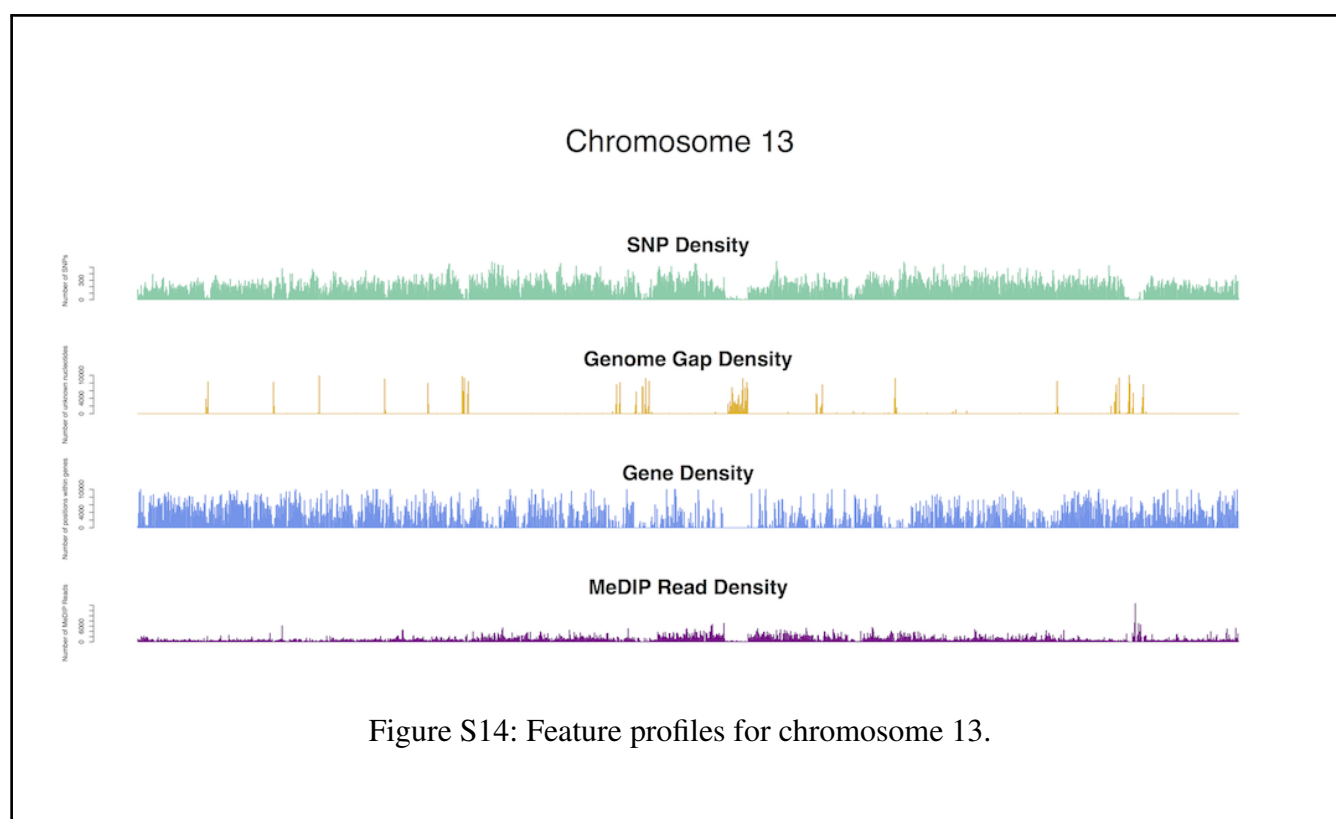

## Chromosome 14

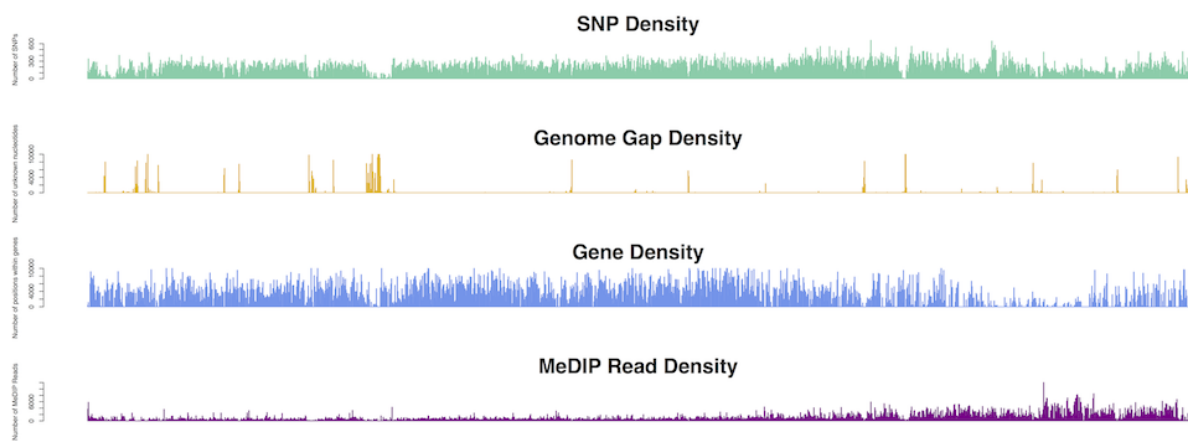

Figure S15: Feature profiles for chromosome 14.

## Chromosome 15

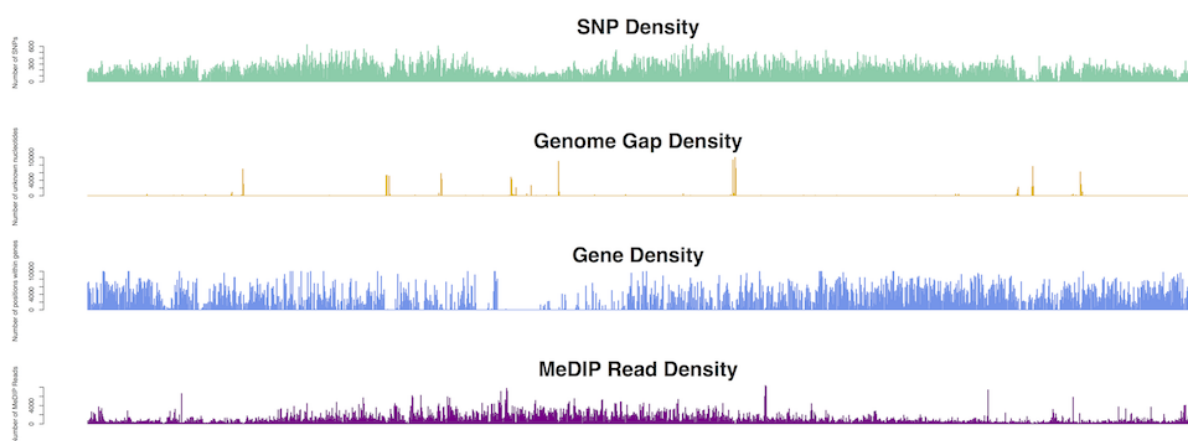

Figure S16: Feature profiles for chromosome 15.

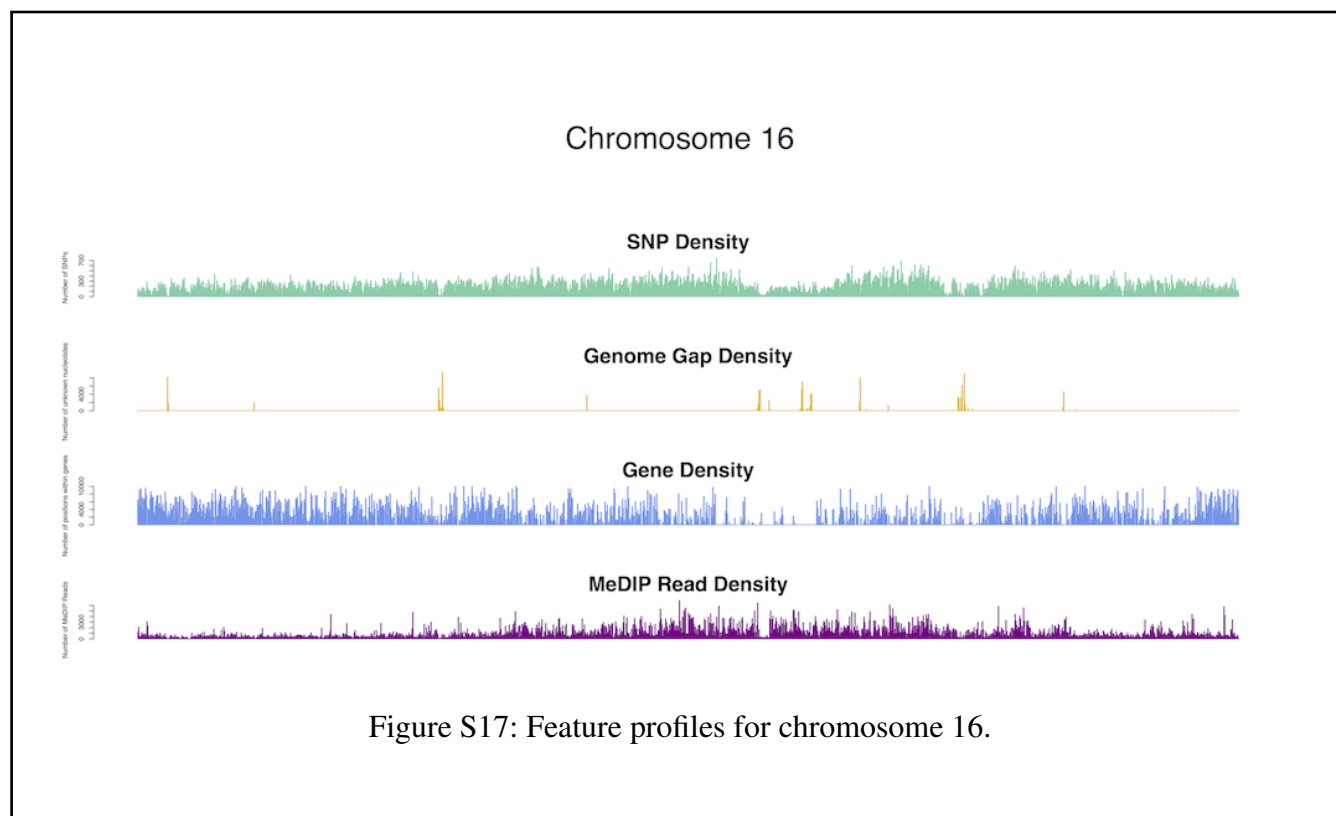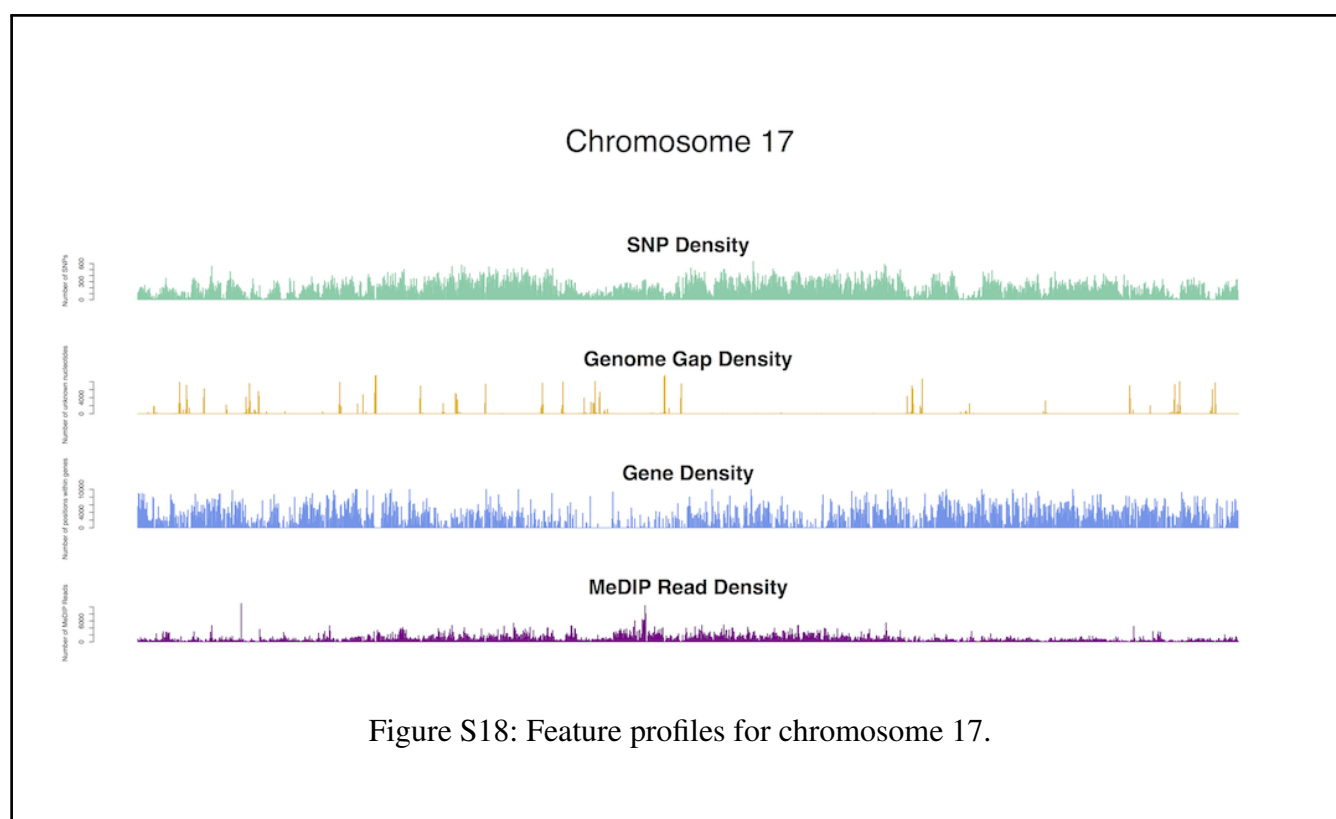

## Chromosome 18

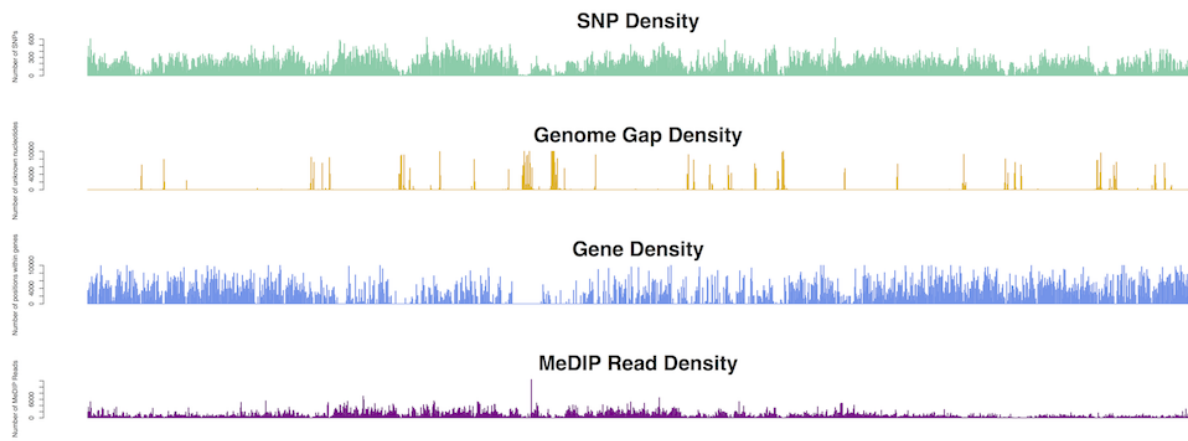

Figure S19: Feature profiles for chromosome 18.

## Chromosome 19

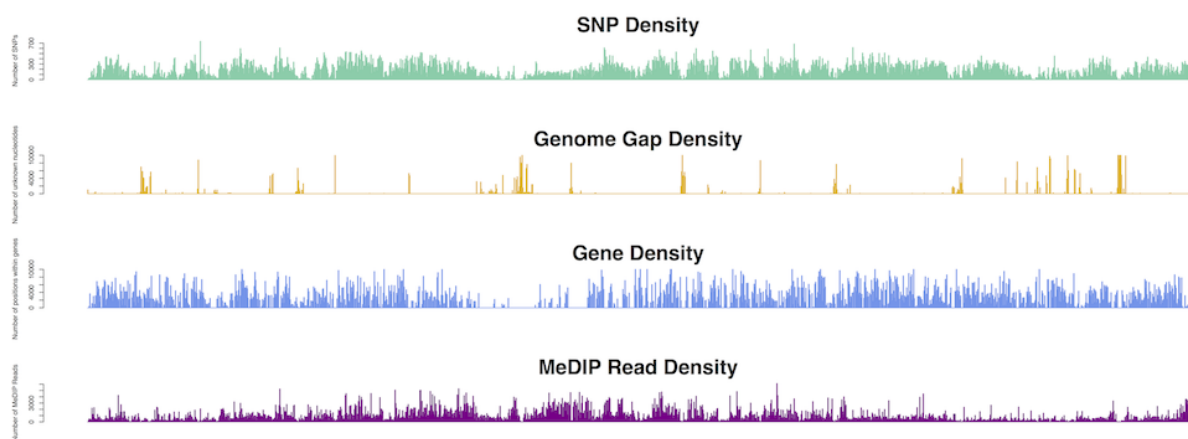

Figure S20: Feature profiles for chromosome 19.

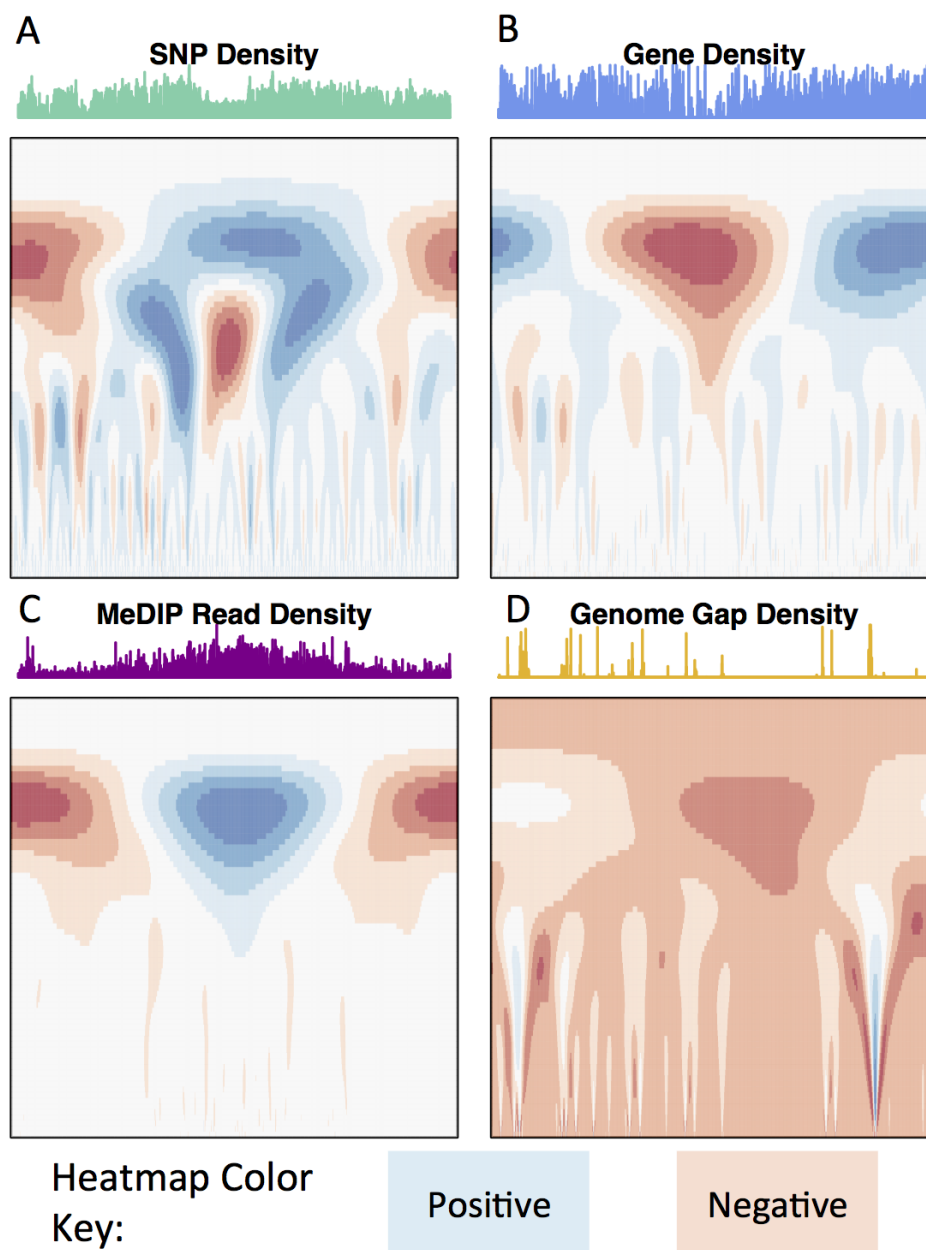

Figure S21: CWT Coefficient landscapes of chromosome 12 for (A) SNP density, (B) gene density, (C) methylation (MeDIP-Seq read density, internode explant tissue) and (D) genome gap density.



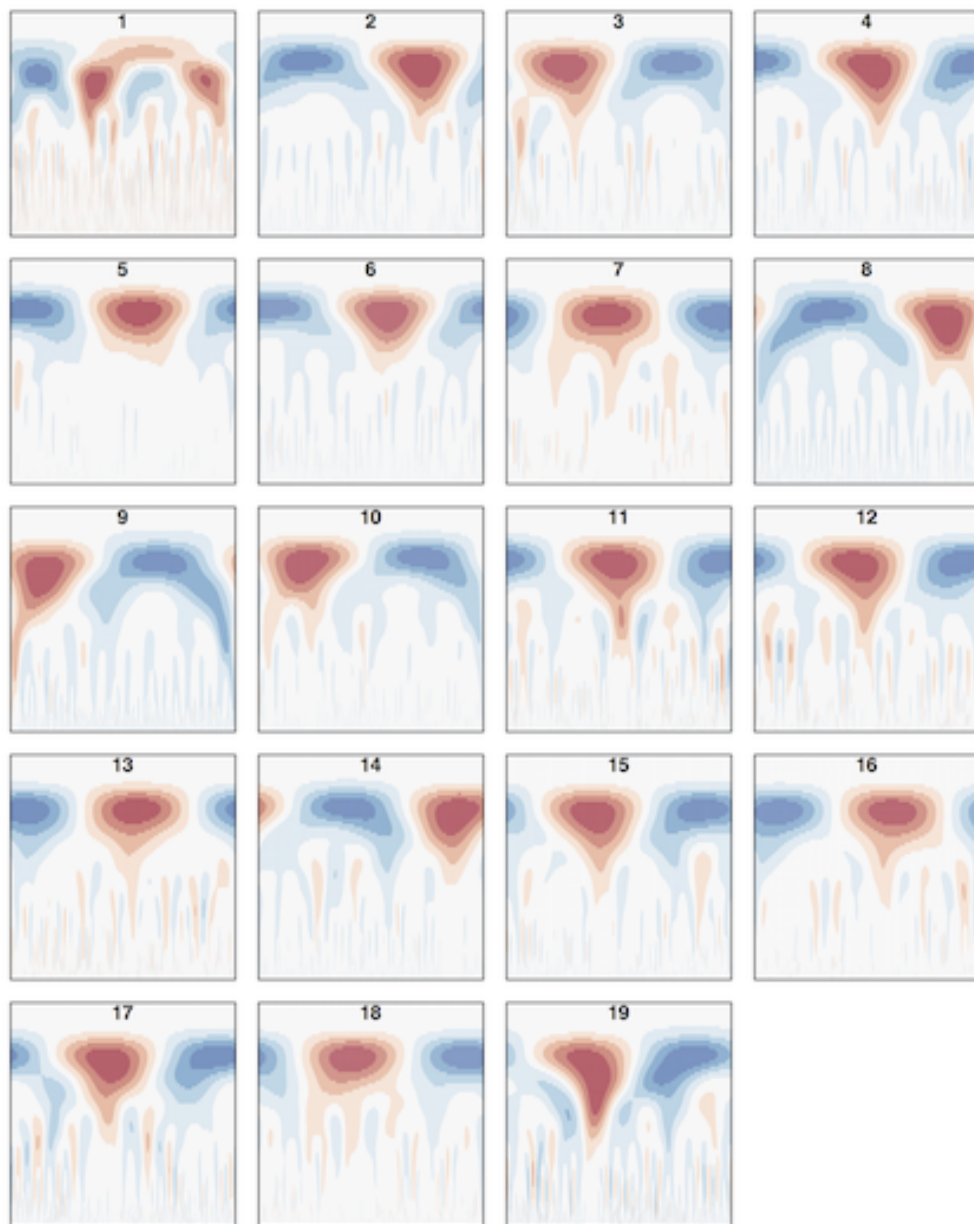

Figure S22: CWT landscape for gene density.

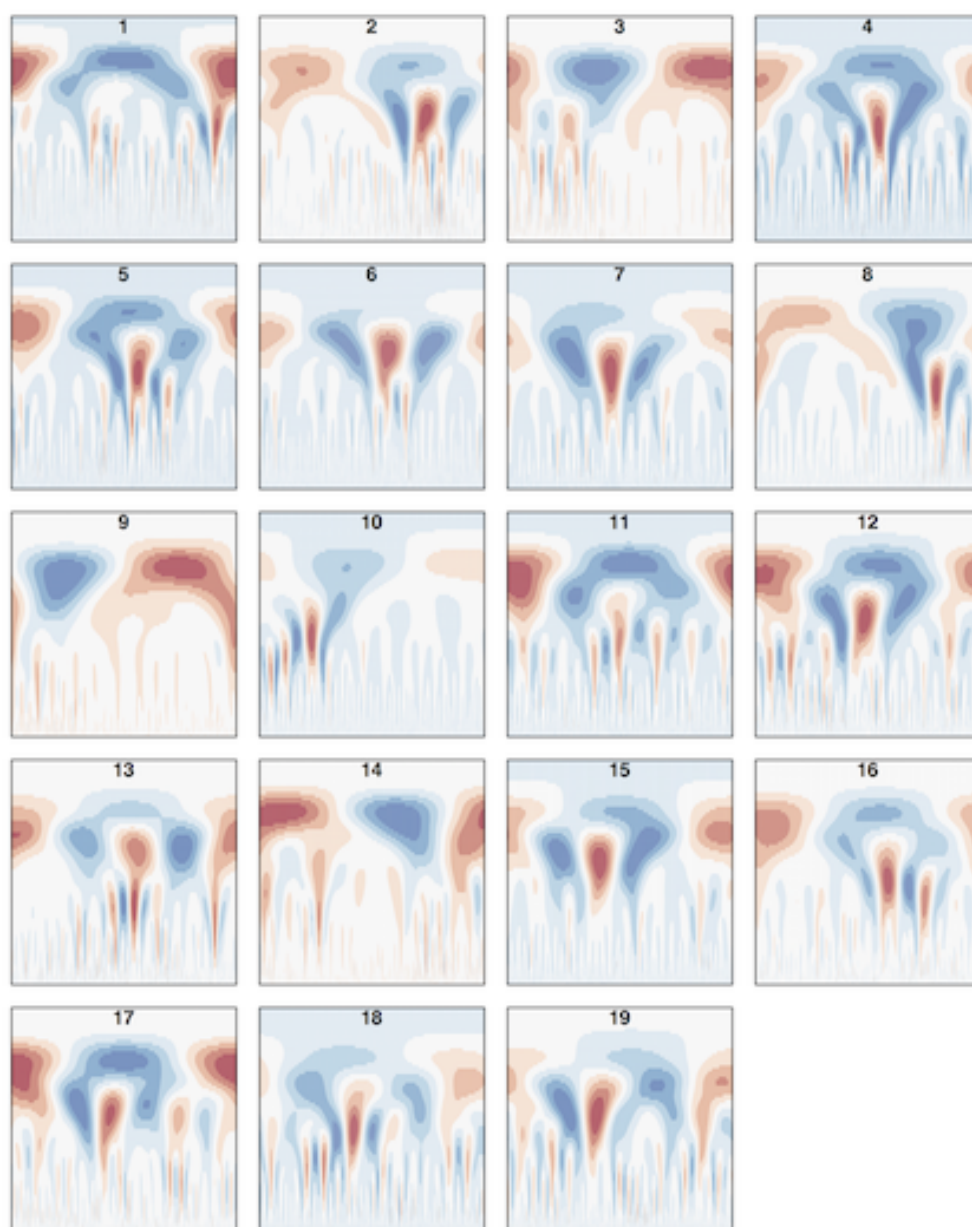

Figure S23: CWT landscape for SNP density.

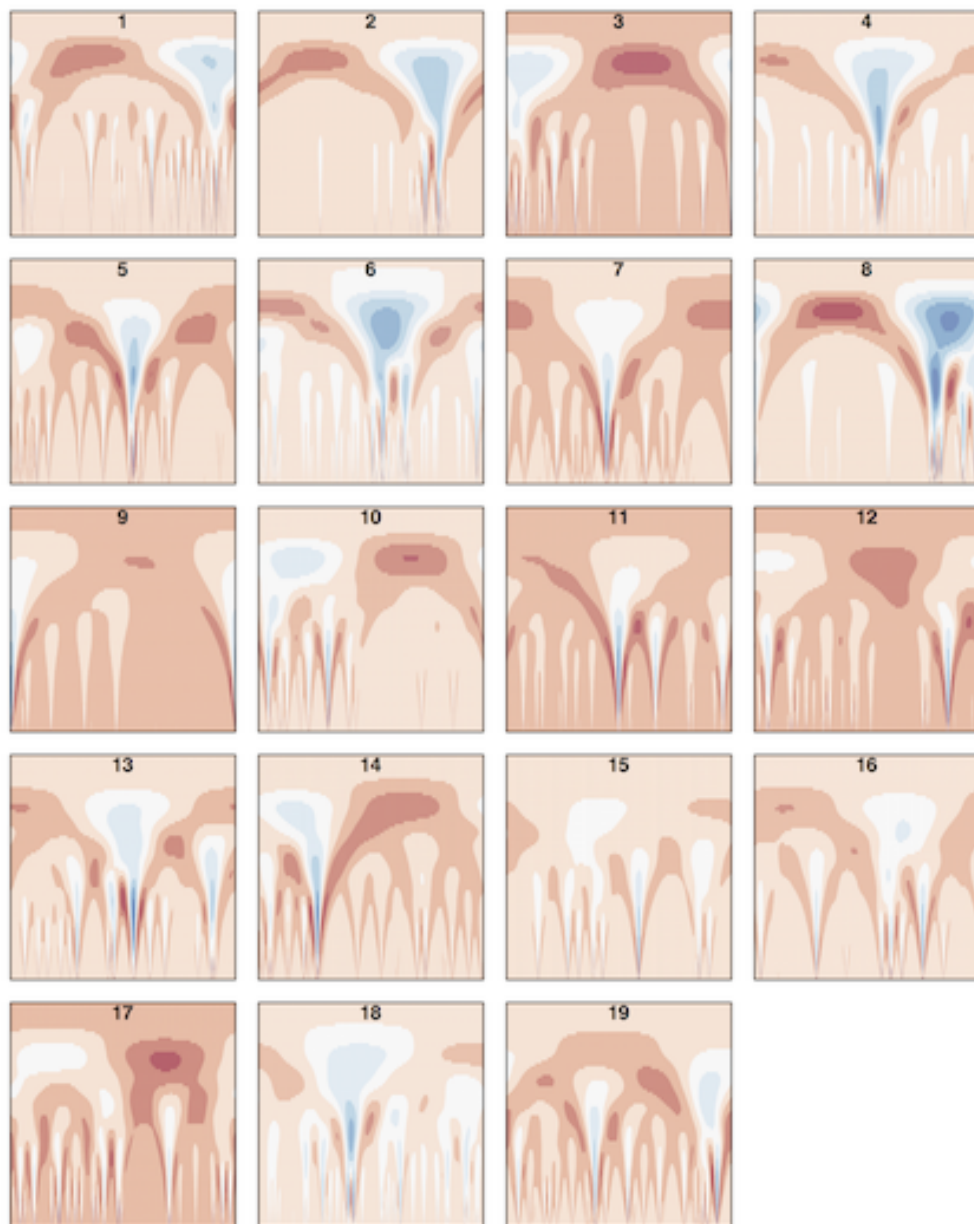

Figure S24: CWT landscape for genome gap density.

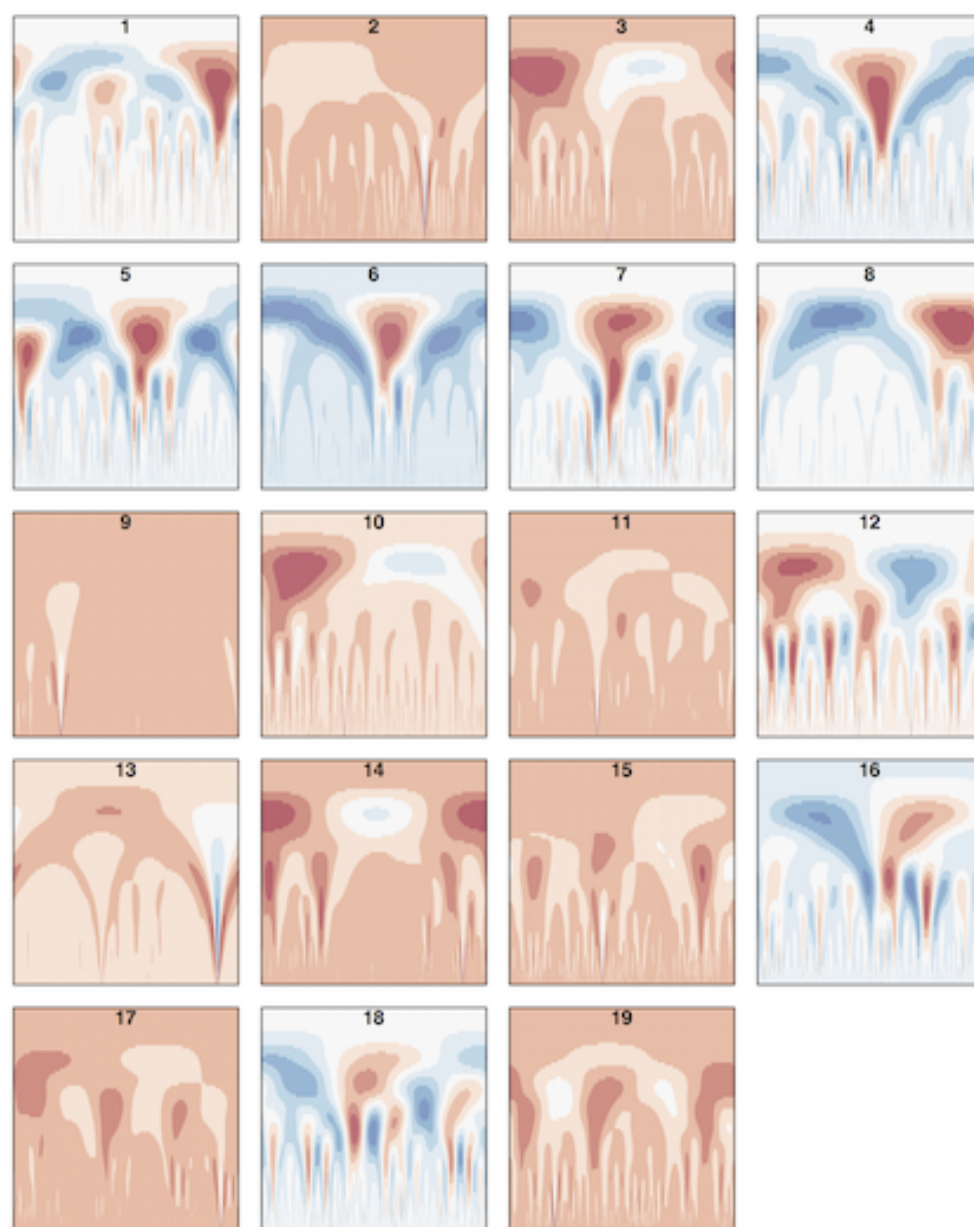

Figure S25: CWT methylation landscape for bud tissue.

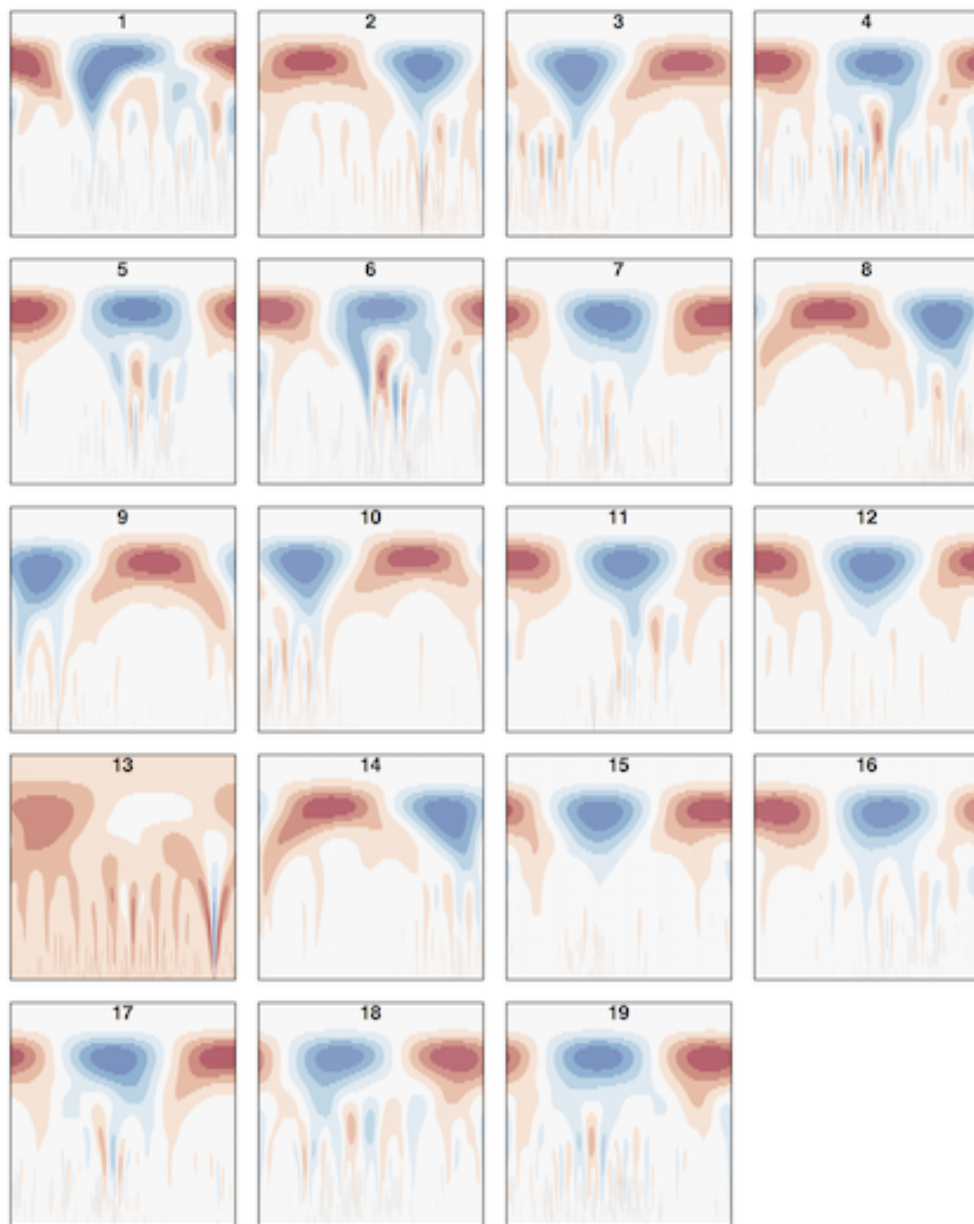

Figure S26: CWT methylation landscape for callus tissue.

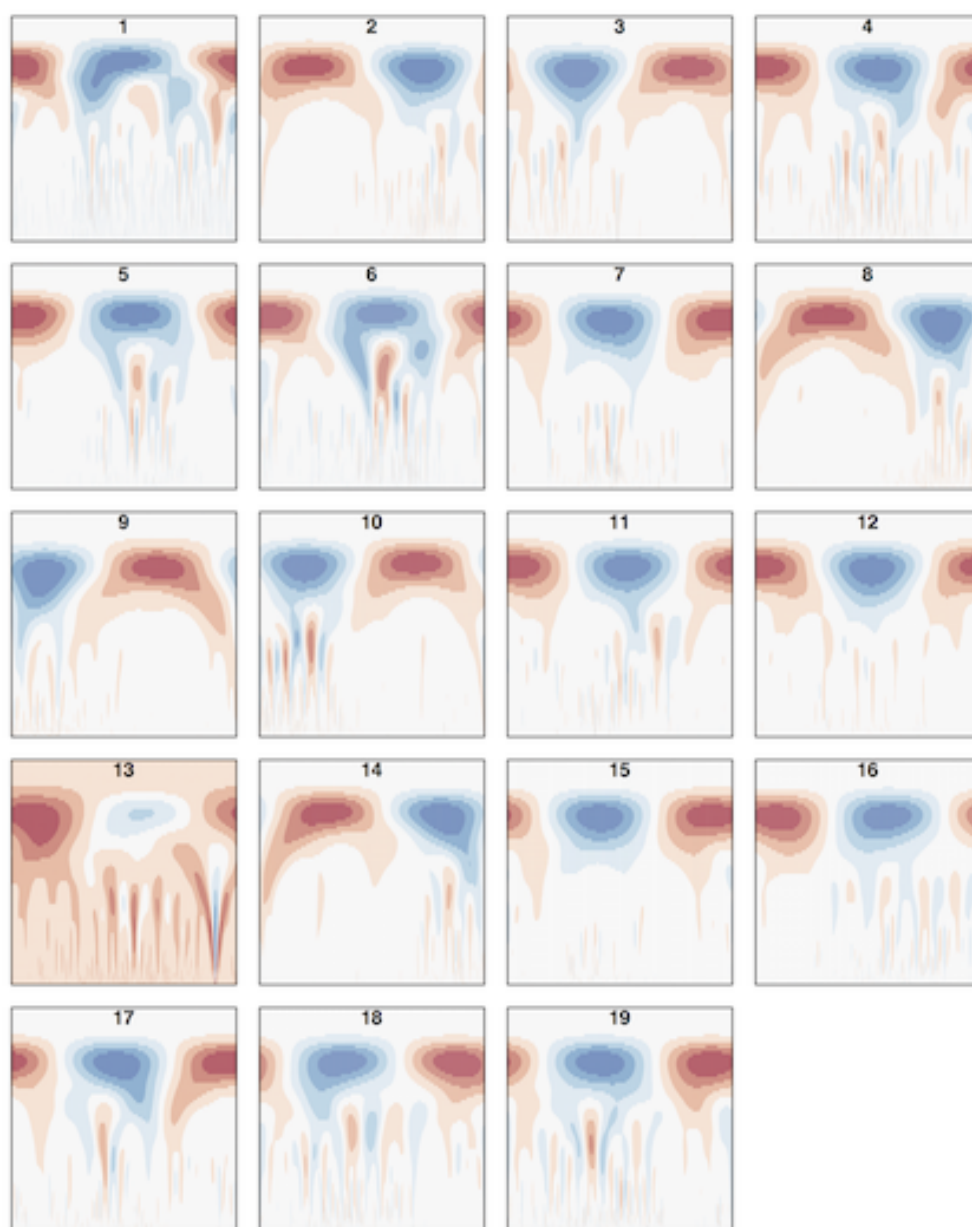

Figure S27: CWT methylation landscape for female catkin tissue.

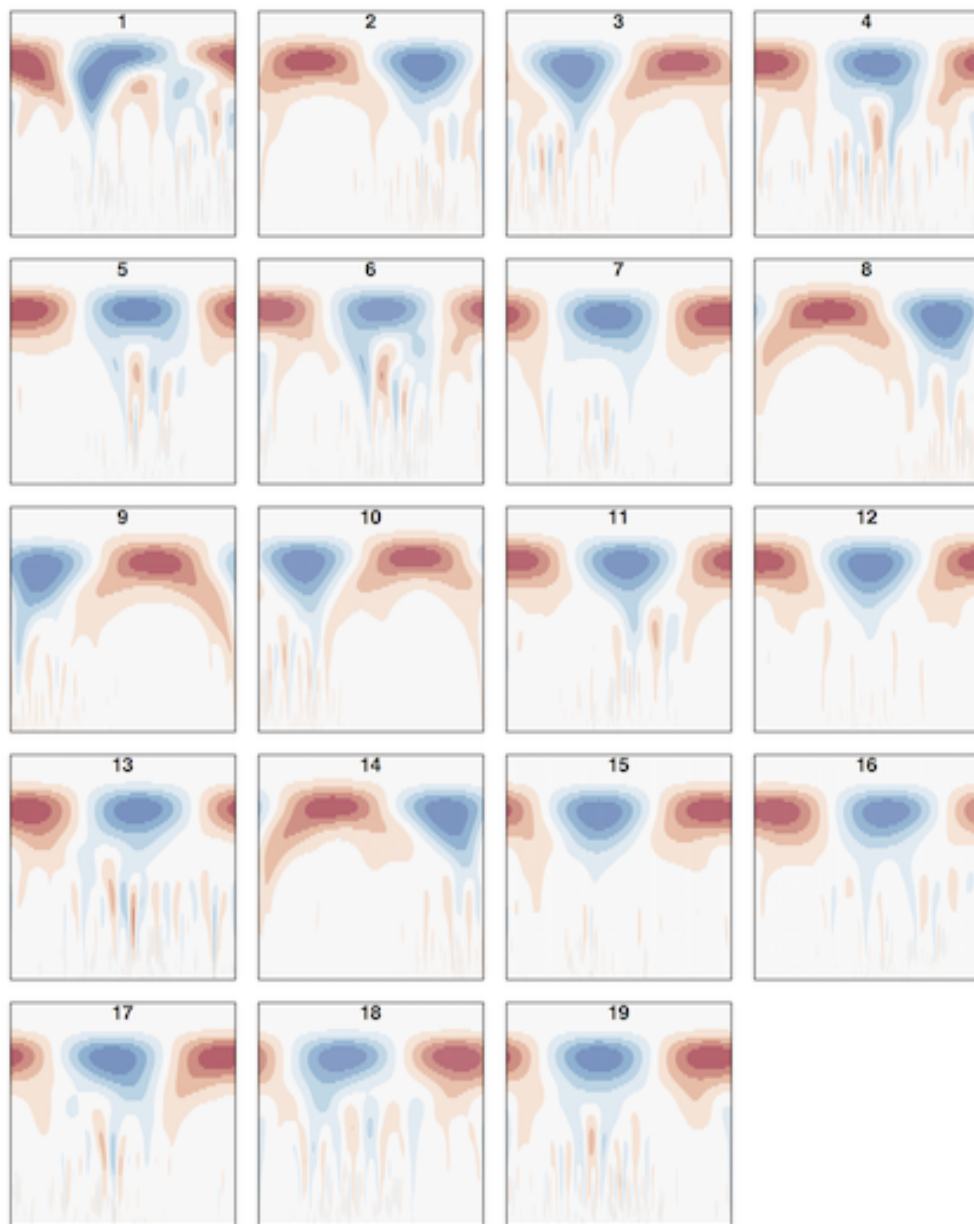

Figure S28: CWT methylation landscape for internode explant tissue.



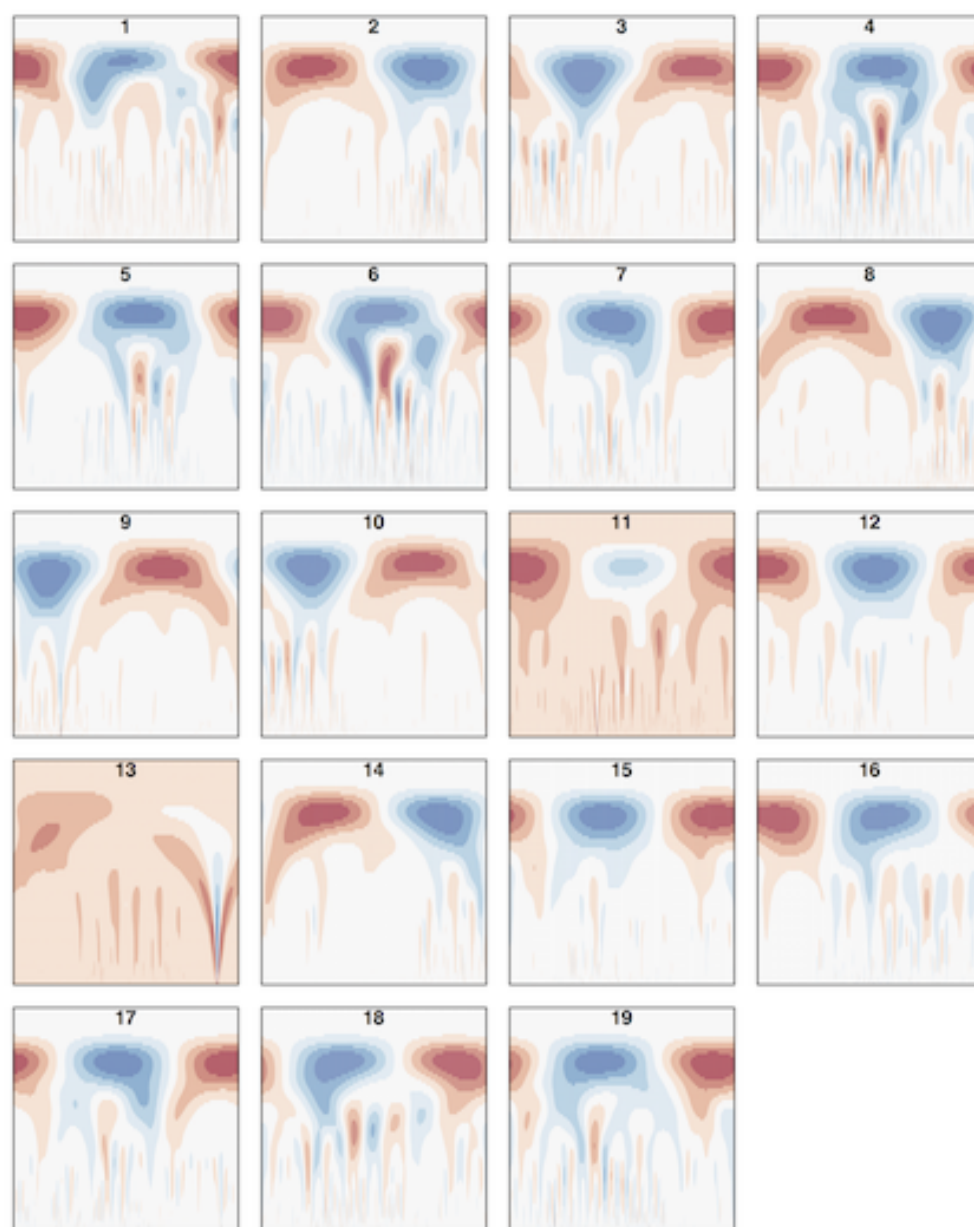

Figure S29: CWT methylation landscape for leaf tissue.



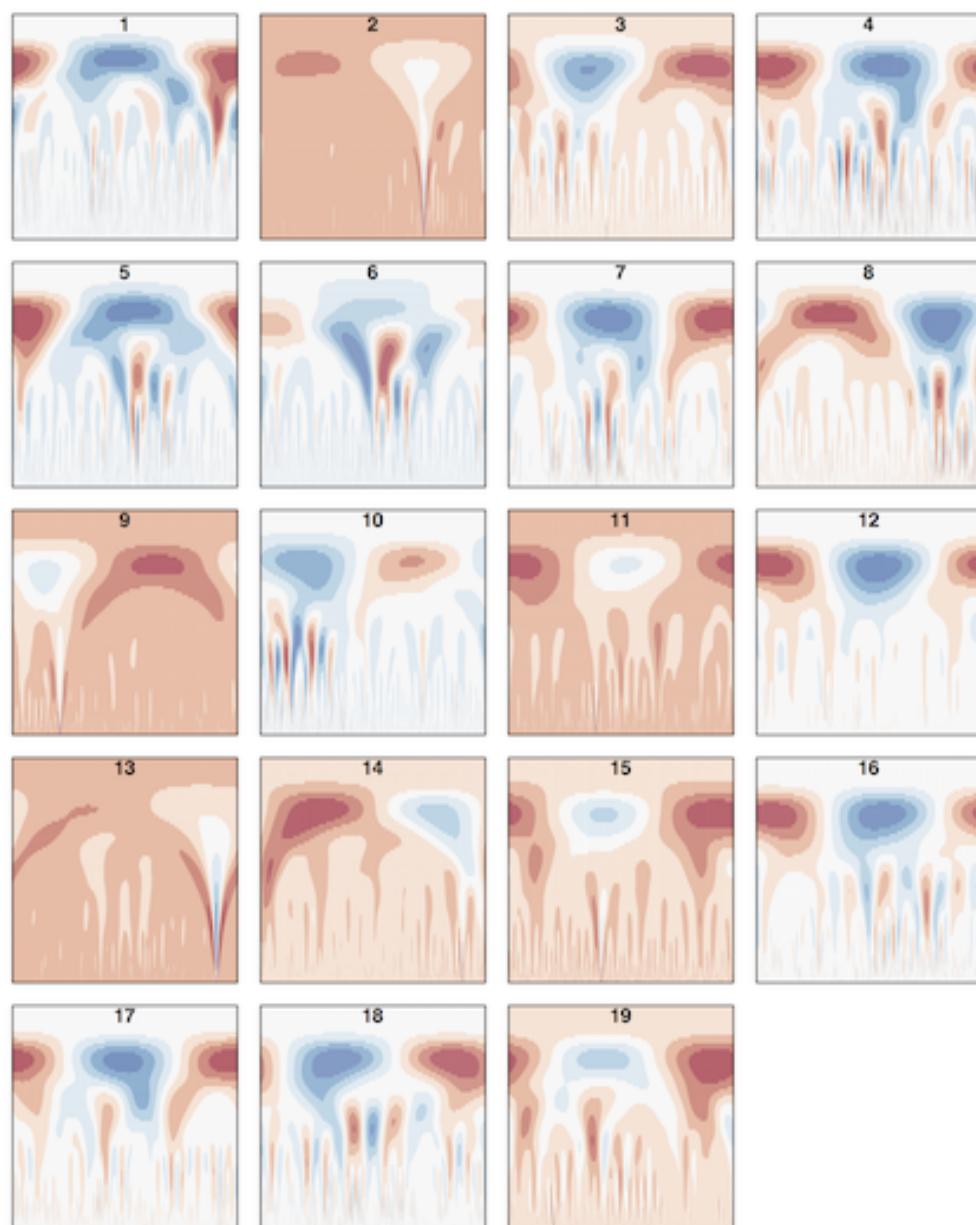

Figure S30: CWT methylation landscape for male catkin tissue.

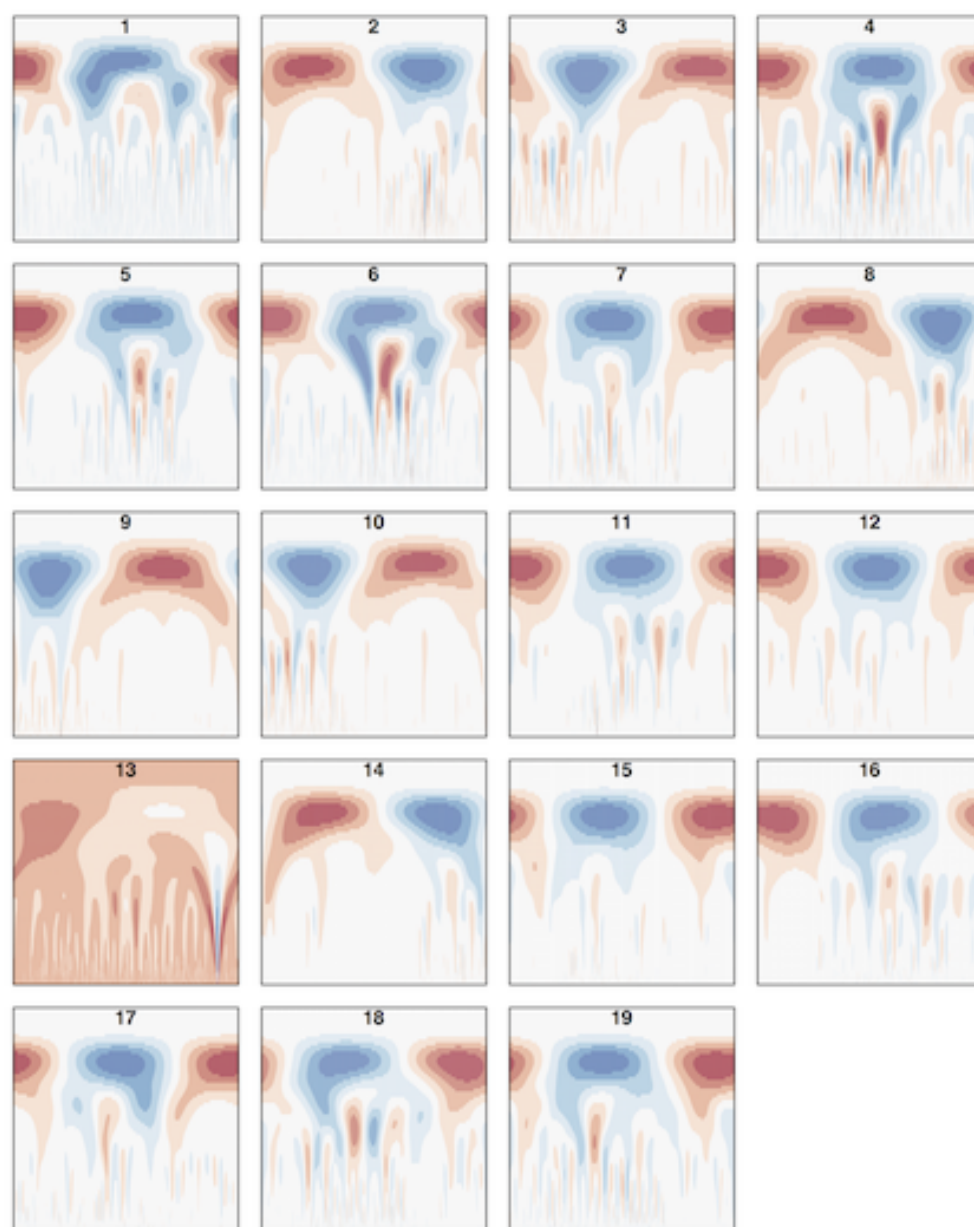

Figure S31: CWT methylation landscape for phloem tissue.

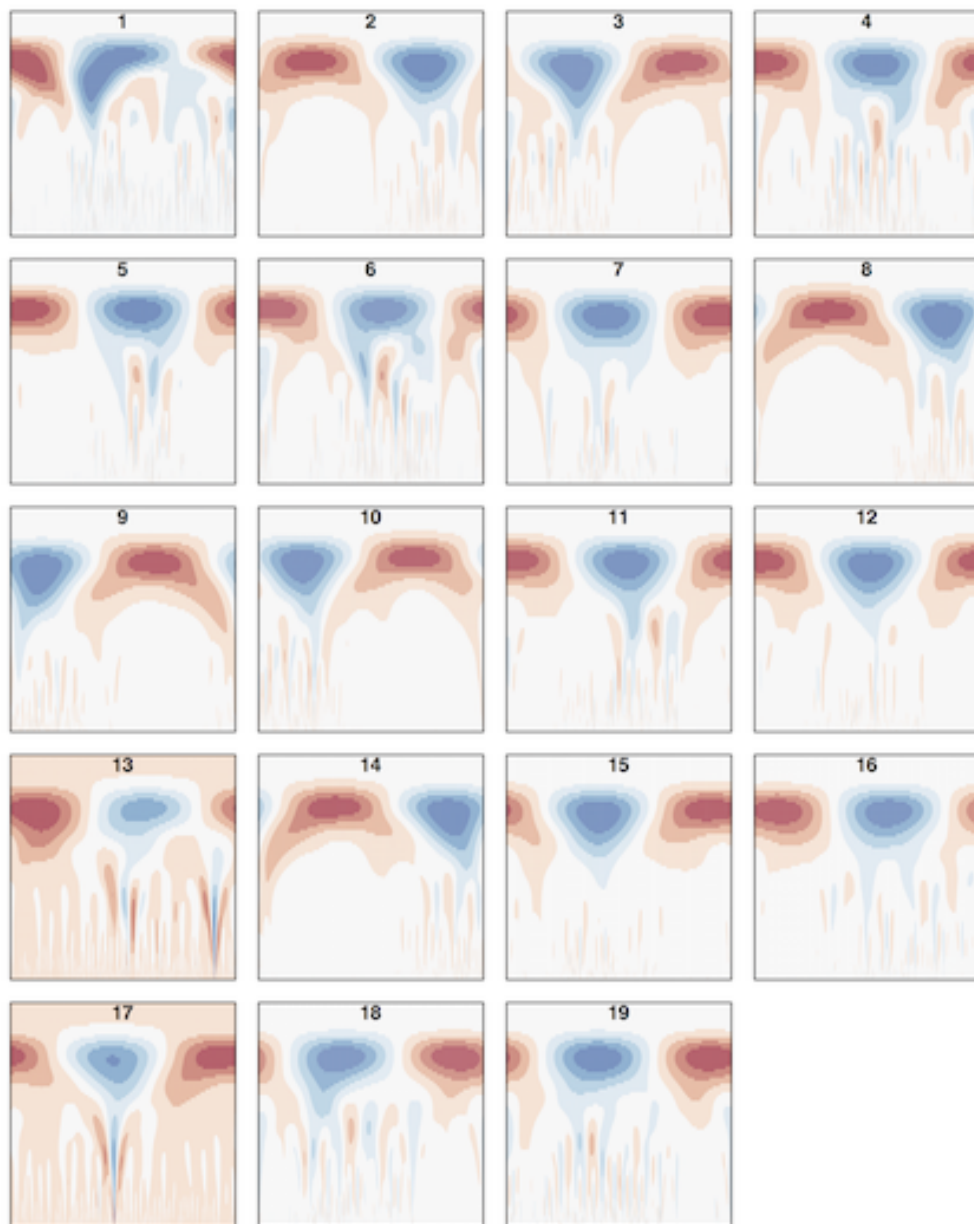

Figure S32: CWT methylation landscape for regenerated internode tissue.

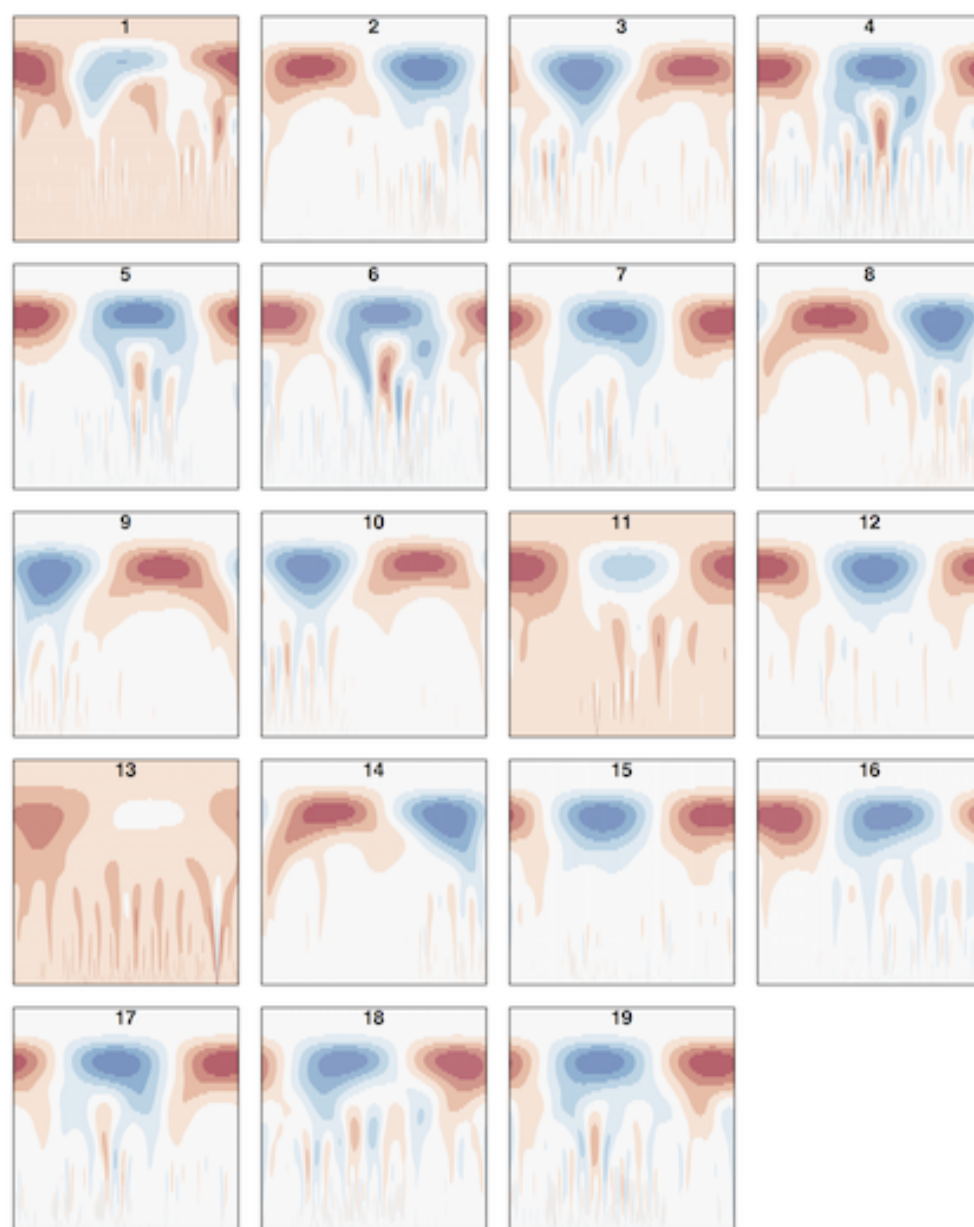

Figure S33: CWT methylation landscape for root tissue.

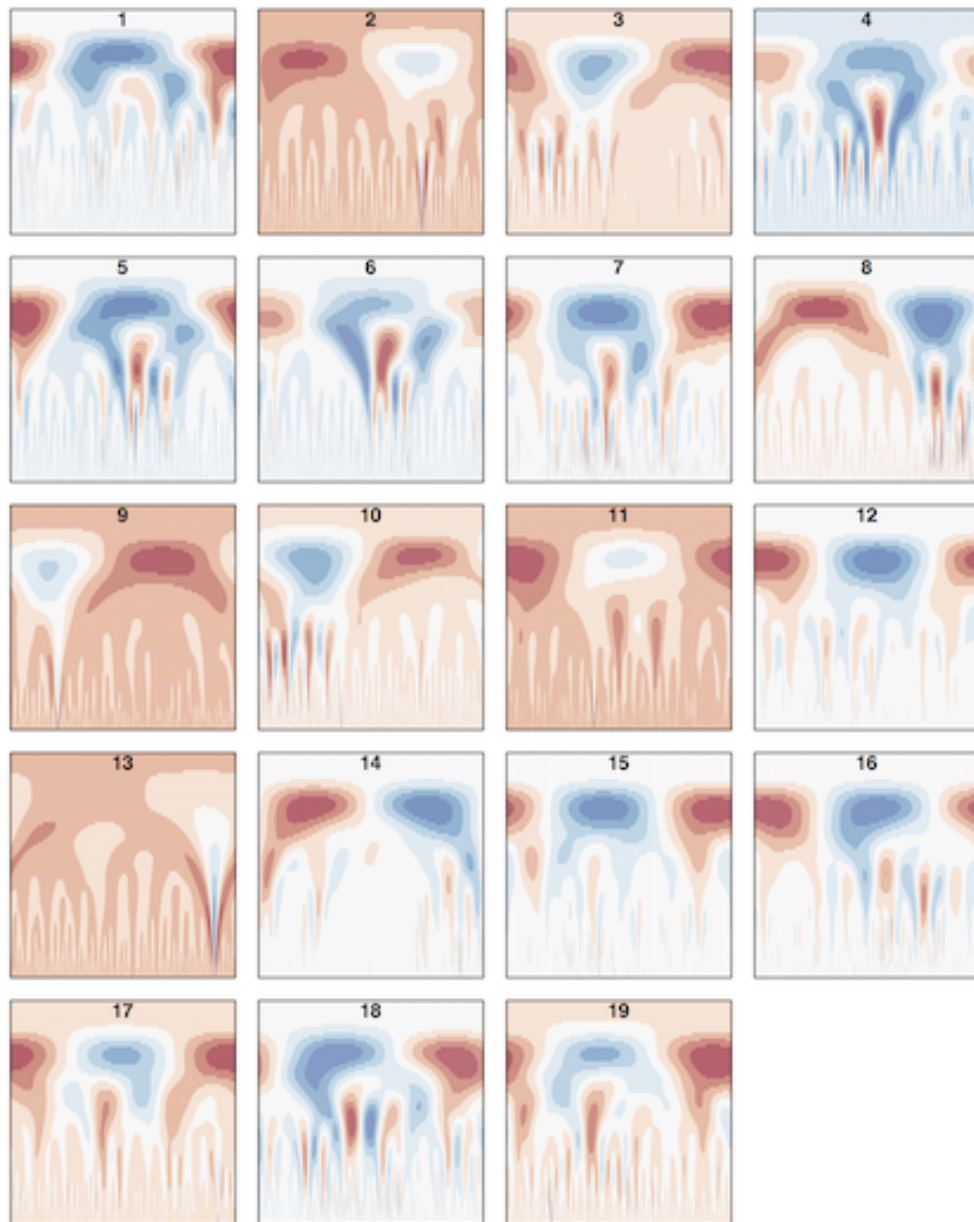

Figure S34: CWT landscape for xylem tissue.

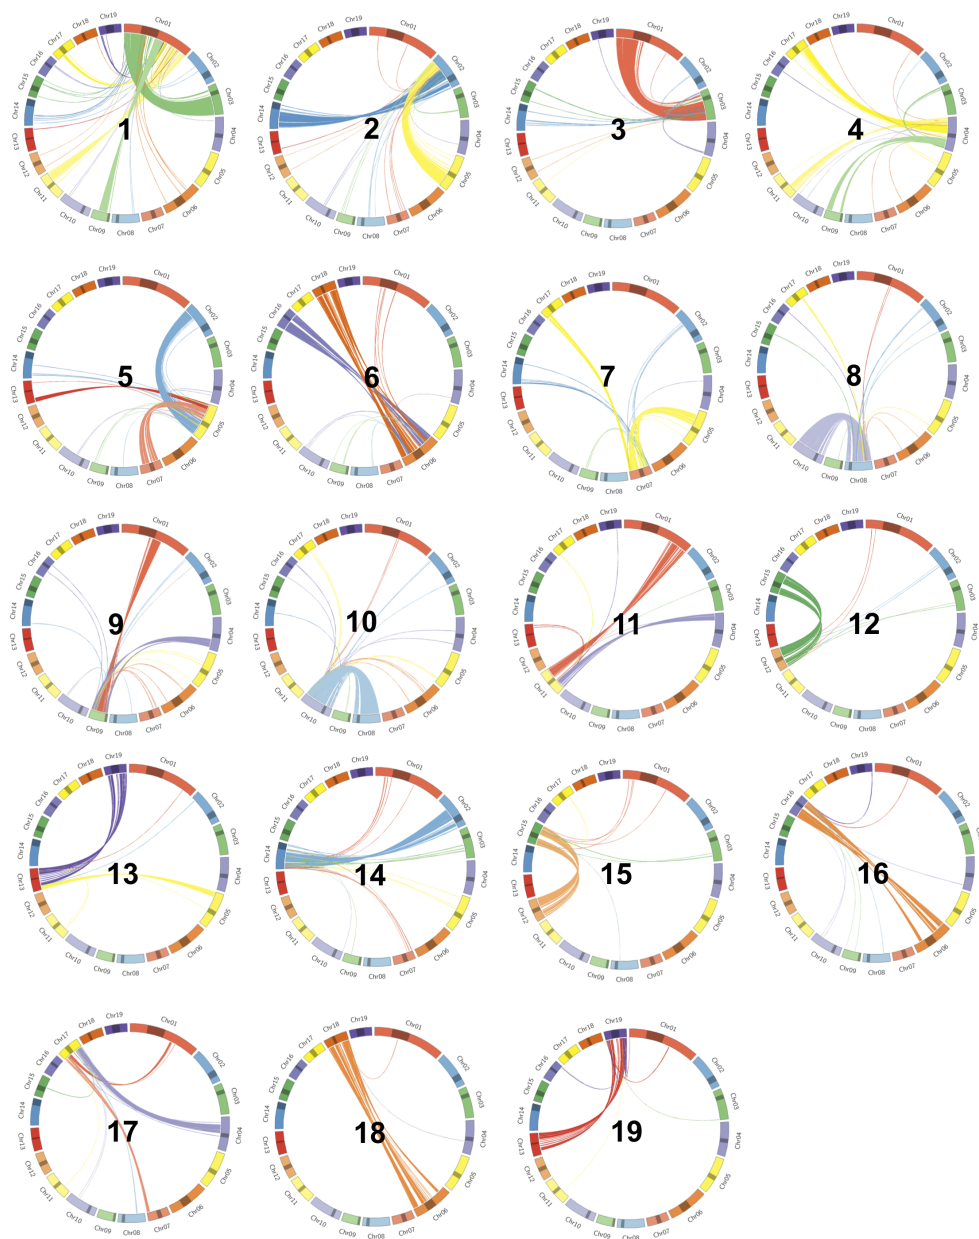

Figure S35: Circos plots representing syntenic blocks, centered around each chromosome, individually. Chromosome lengths are represented on the ideograms with the predicted centromeric/pericentromeric regions shown as dark highlights. Links between chromosomes indicate homologous chromosome regions, and are colored according to the source chromosome. The target chromosome is indicated by the number within each circos plot.

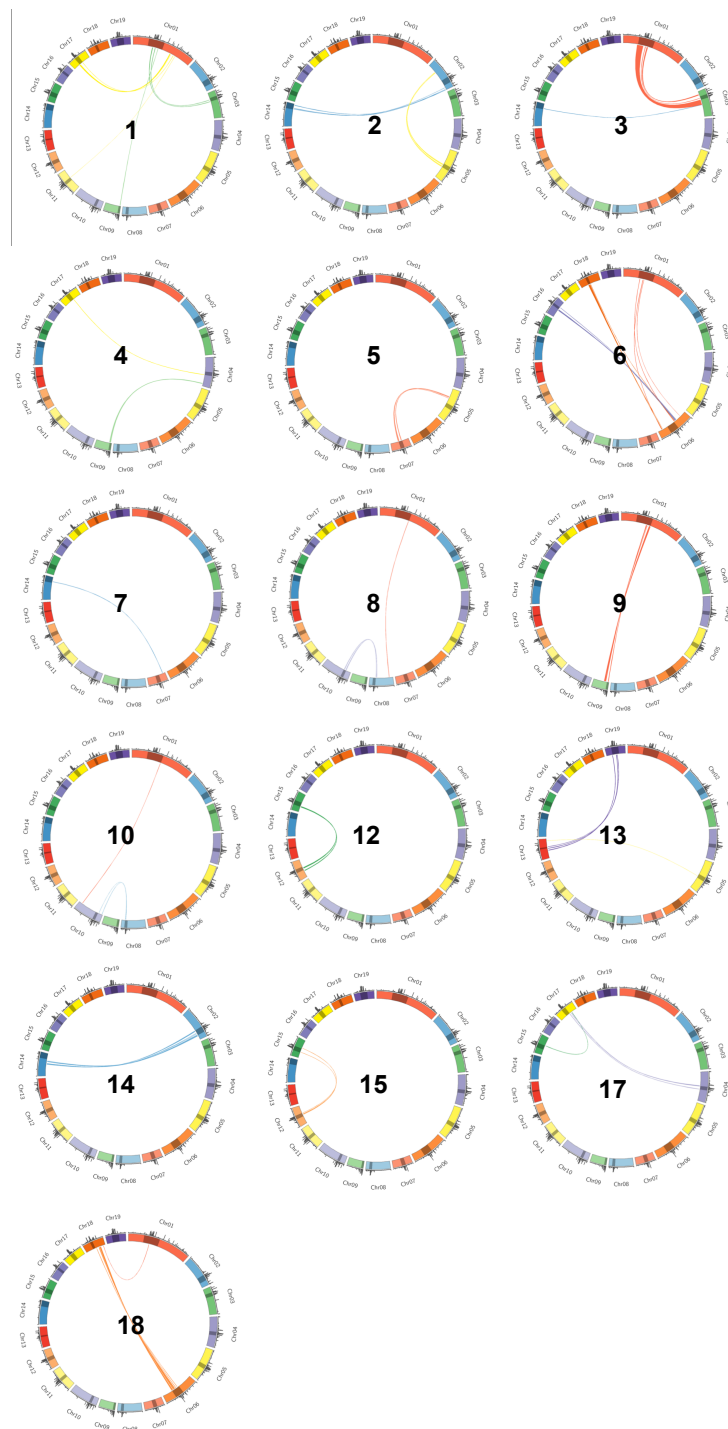

Figure S36: Syntenic blocks from Figure S35 which overlap with predicted centromeric/pericentromeric regions on source chromosomes. PGSB centromere repeat densities from Figure 9 in the main text are included as a bar chart on the ideogram.



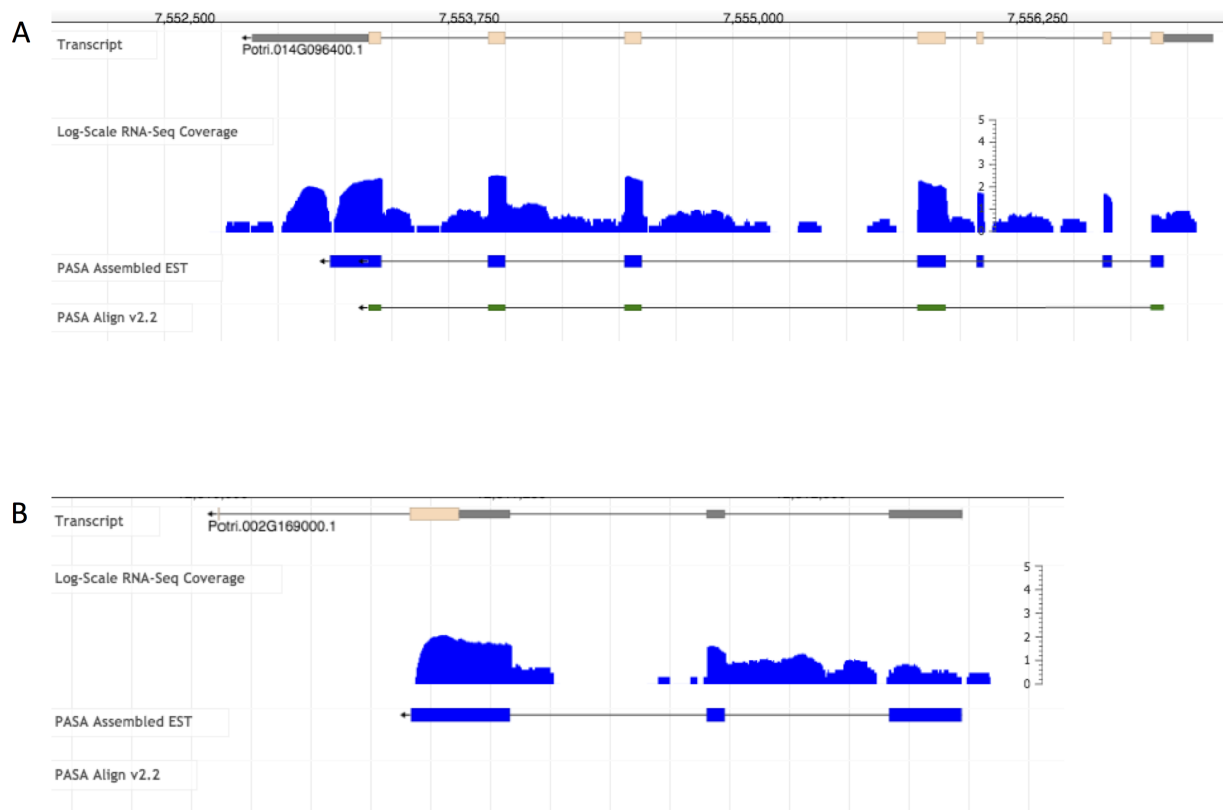

Figure S37: CENH3 candidate genes expression evidence. Two CENH3 candidates in *P. trichocarpa* (A) Potri.014G096400 and (B) Potri.002G169000 both show evidence of expression in the RNA-seq and EST coverage. Figure obtained using the Jbrowse plugin Skinner et al. (2009) on Phytozome Goodstein et al. (2012).



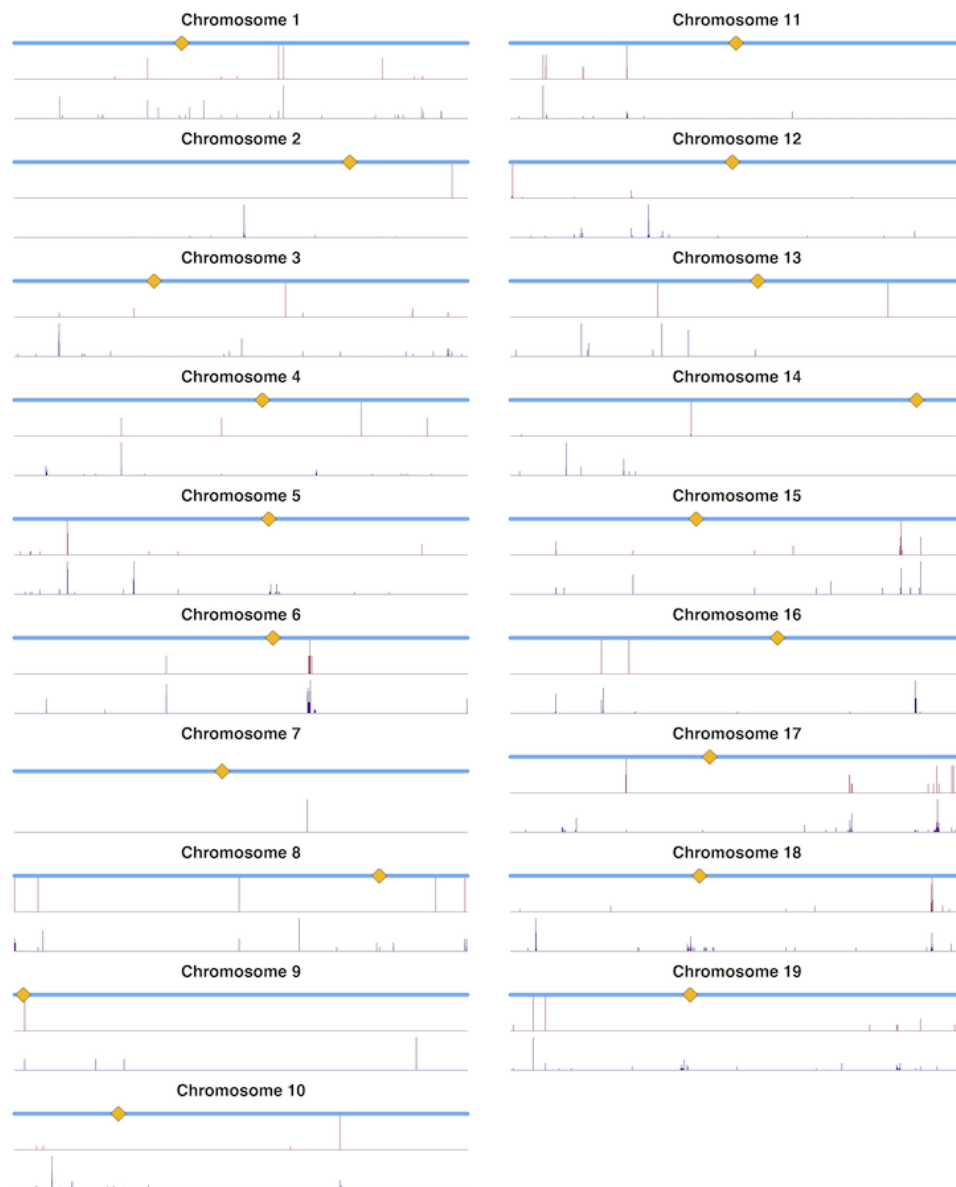

Figure S38: CENH3 gene correlations. Centromere positions (yellow diamonds) determined from wavelet coefficients and the density of SNPs correlating with SNPs in *P. trichocarpa* CENH3 genes. Red tracks are SNPs which correlate with SNPs in Potri.014G096400, and purple tracks are SNPs which correlate with SNPs in Potri.002G169000.

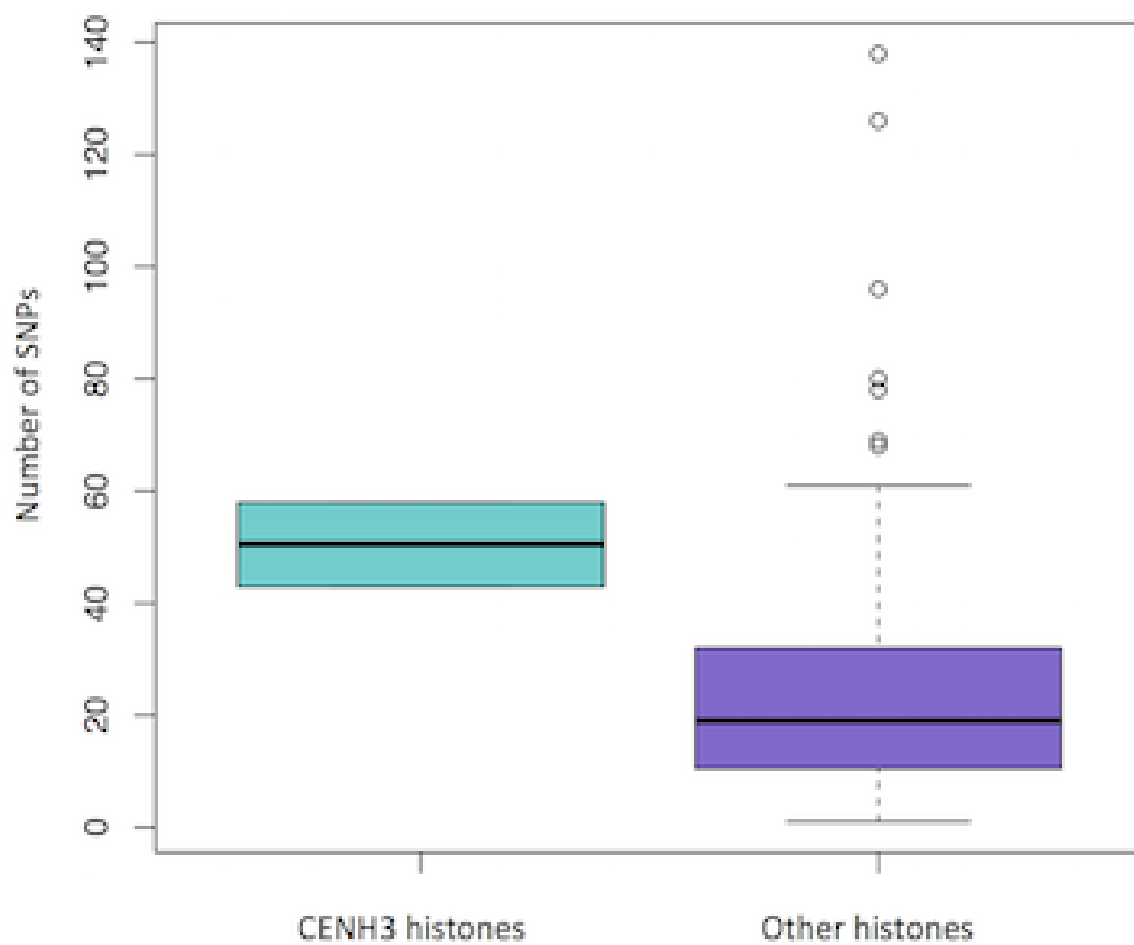

Figure S39: SNPs in *P. trichocarpa* histones. Boxplot showing the number of SNPs in the two candidate CENH3 histones versus other histones in *P. trichocarpa*.

## SUPPLEMENTARY TABLES

**Table S1.** Positions in density signals of the approximate centromere locations, the left and right borders indicated in Figure 8 and approximate centromeric/pericentromeric length. Bp ranges indicate the borders of the particular bin in the density signal.

| Chrom | Left border bin (bp)  | Center bin (bp)       | Right border bin (bp) | Length (Mbp) |
|-------|-----------------------|-----------------------|-----------------------|--------------|
| 1     | 12,550,001-12,560,000 | 18,640,001-18,650,000 | 24,930,001-24,940,000 | 12.39        |
| 2     | 16,680,001-16,690,000 | 18,690,001-18,700,000 | 21,170,001-21,180,000 | 4.50         |
| 3     | 4,380,001-4,390,000   | 6,720,001-6,730,000   | 7,300,001-7,310,000   | 2.93         |
| 4     | 11,770,001-11,780,000 | 13,270,001-13,280,000 | 14,710,001-14,720,000 | 2.95         |
| 5     | 12,960,001-12,970,000 | 14,530,001-14,540,000 | 16,230,001-16,240,000 | 3.28         |
| 6     | 12,510,001-12,520,000 | 15,930,001-15,940,000 | 19,270,001-19,280,000 | 6.77         |
| 7     | 5,620,001-5,630,000   | 7,160,001-7,170,000   | 8,620,001-8,630,000   | 3.01         |
| 8     | 14,670,001-14,680,000 | 15,670,001-15,680,000 | 16,790,001-16,800,000 | 2.13         |
| 9     | 1-10,000              | 250,001-260,000       | 1,610,001-1,620,000   | 1.62         |
| 10    | 4,220,001-4,230,000   | 5,180,001-5,190,000   | 6,220,001-6,230,000   | 2.01         |
| 11    | 8,390,001-8,400,000   | 9,210,001-9,220,000   | 10,770,001-10,780,000 | 2.39         |
| 12    | 6,370,001-6,380,000   | 7,720,001-7,730,000   | 9,320,001-9,330,000   | 2.96         |
| 13    | 8,400,001-8,410,000   | 8,910,001-8,920,000   | 9,500,001-9,510,000   | 1.11         |
| 14    | 14,290,001-14,300,000 | 16,960,001-16,970,000 | 18,920,001-18,930,000 | 4.64         |
| 15    | 4,480,001-4,490,000   | 6,260,001-6,270,000   | 7,980,001-7,990,000   | 3.51         |
| 16    | 7,470,001-7,480,000   | 8,540,001-8,550,000   | 9,470,001-9,480,000   | 2.01         |
| 17    | 5,700,001-5,710,000   | 7,070,001-7,080,000   | 8,980,001-8,990,000   | 3.29         |
| 18    | 6,130,001-6,140,000   | 7,070,001-7,080,000   | 8,110,001-8,120,000   | 1.99         |
| 19    | 4,970,001-4,980,000   | 6,320,001-6,330,000   | 10,440,001-10,450,000 | 5.48         |

**Table S2.** Pairs of SNPs passing the SNP correlation threshold of 0.7 for which one of the SNPs resides within Potri.002G169000, the putative CENH3 on *P. trichocarpa* chromosome 2..

*See attached excel sheet*

**Table S3.** Pairs of SNPs passing the SNP correlation threshold of 0.7 for which one of the SNPs resides within Potri.014G096400, the putative CENH3 on *P. trichocarpa* chromosome 14.

*See attached excel sheet*

**Table S4.** Results of BLASTing *Arabidopsis thaliana* CENH3 against the *P. trichocarpa* genome .

*See attached excel sheet*

**Table S5.** Number of SNPs in *P. trichocarpa* histone genes.

*See attached excel sheet*

**Table S6.** Genes co-expressing with Potri.002G169000 on PhytoMine Kalderimis et al. (2014) from Phytozome Goodstein et al. (2012).

---

*See attached excel sheet*

---

**Table S7.** Genes co-expressing with Potri.014G096400 on PhytoMine Kalderimis et al. (2014) from Phytozome Goodstein et al. (2012). Blue highlighted genes are histone-related.

---

*See attached excel sheet*

---

## REFERENCES

- Goodstein, D. M., Shu, S., Howson, R., Neupane, R., Hayes, R. D., Fazo, J., et al. (2012). Phytozome: a comparative platform for green plant genomics. *Nucleic Acids Research* 40, D1178–D1186
- Kalderimis, A., Lyne, R., Butano, D., Contrino, S., Lyne, M., Heimbach, J., et al. (2014). InterMine: extensive web services for modern biology. *Nucleic acids research* 42, W468–W472
- Skinner, M. E., Uzilov, A. V., Stein, L. D., Mungall, C. J., and Holmes, I. H. (2009). JBrowse: A next-generation genome browser. *Genome Research* 19, 1630–1638
